# Supplementary material for: Accurate and sensitive mutational signature analysis with MuSiCal
Source: PubMed Central journal article supplement (PMC10937379; doi:10.1038/s41588-024-01659-0), 2024-02-15
Supplement: 41588_2024_1659_MOESM4_ESM.pdf [file 41588_2024_1659_MOESM4_ESM.pdf]

## Supplementary Data

In the Supplementary Data below, we show simulated examples as in Fig. 3a, but for the other 24 tumor types. Specifically, the true signatures were plotted in panel (a), where the percentages below signature names denote exposure strengths of corresponding signatures. *De novo* signatures extracted by MuSiCal were plotted in panel (b). *De novo* signatures extracted by SigProfilerExtractor were plotted in panel (c). The precision-recall curves (PRCs) for both methods were plotted in panel (d), with area under PRC (auPRC) annotated. The matching result corresponding to the largest achieved F1 score was shown in panels (e) and (f) for MuSiCal and SigProfilerExtractor, respectively. Tumor types were ordered as in Fig. 3b.

Bladder-TCC

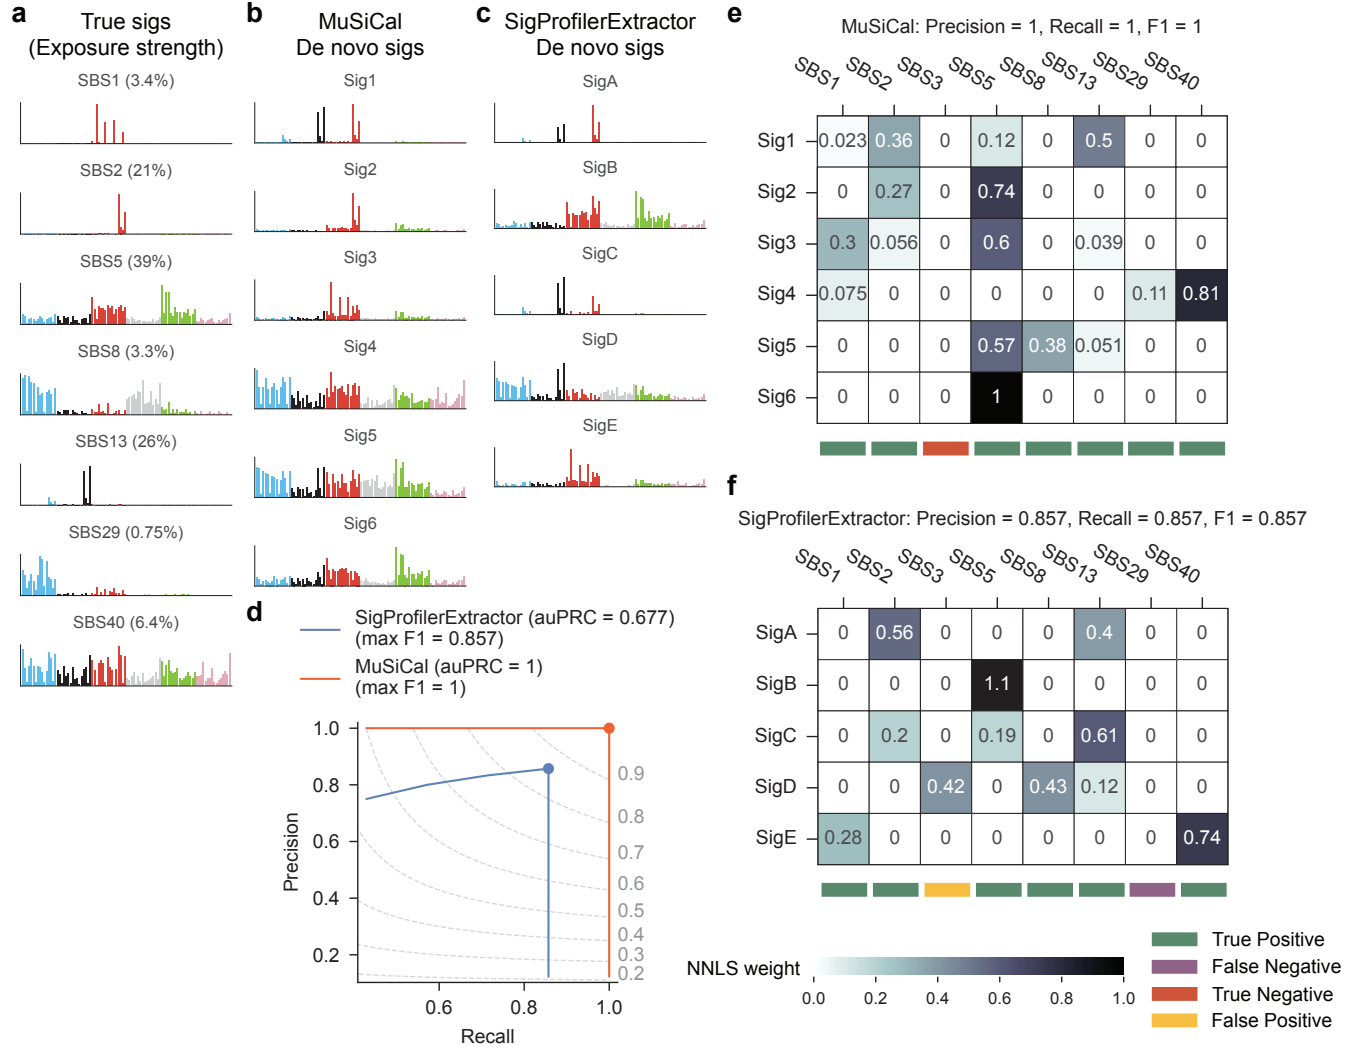

Supplementary Data Fig. 1 Same as Fig. 3a, but for Bladder-TCC.

## Breast-AdenoCA

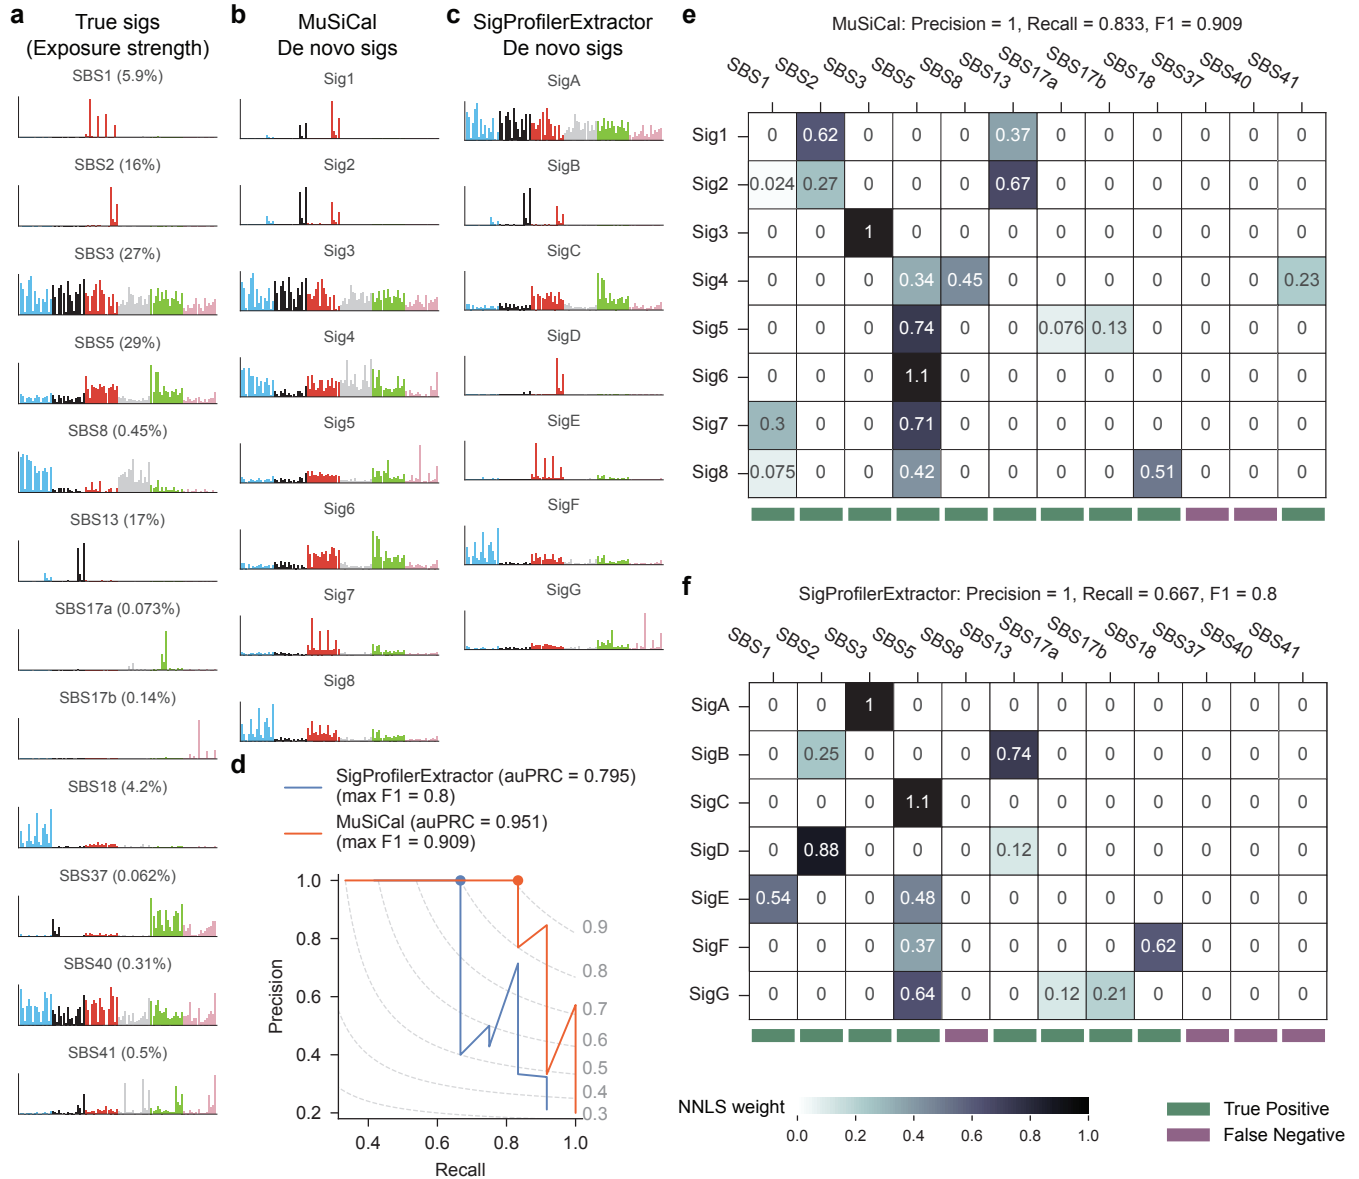

Supplementary Data Fig. 2 Same as Fig. 3a, but for Breast-AdenoCA.

## CNS-PiloAstro

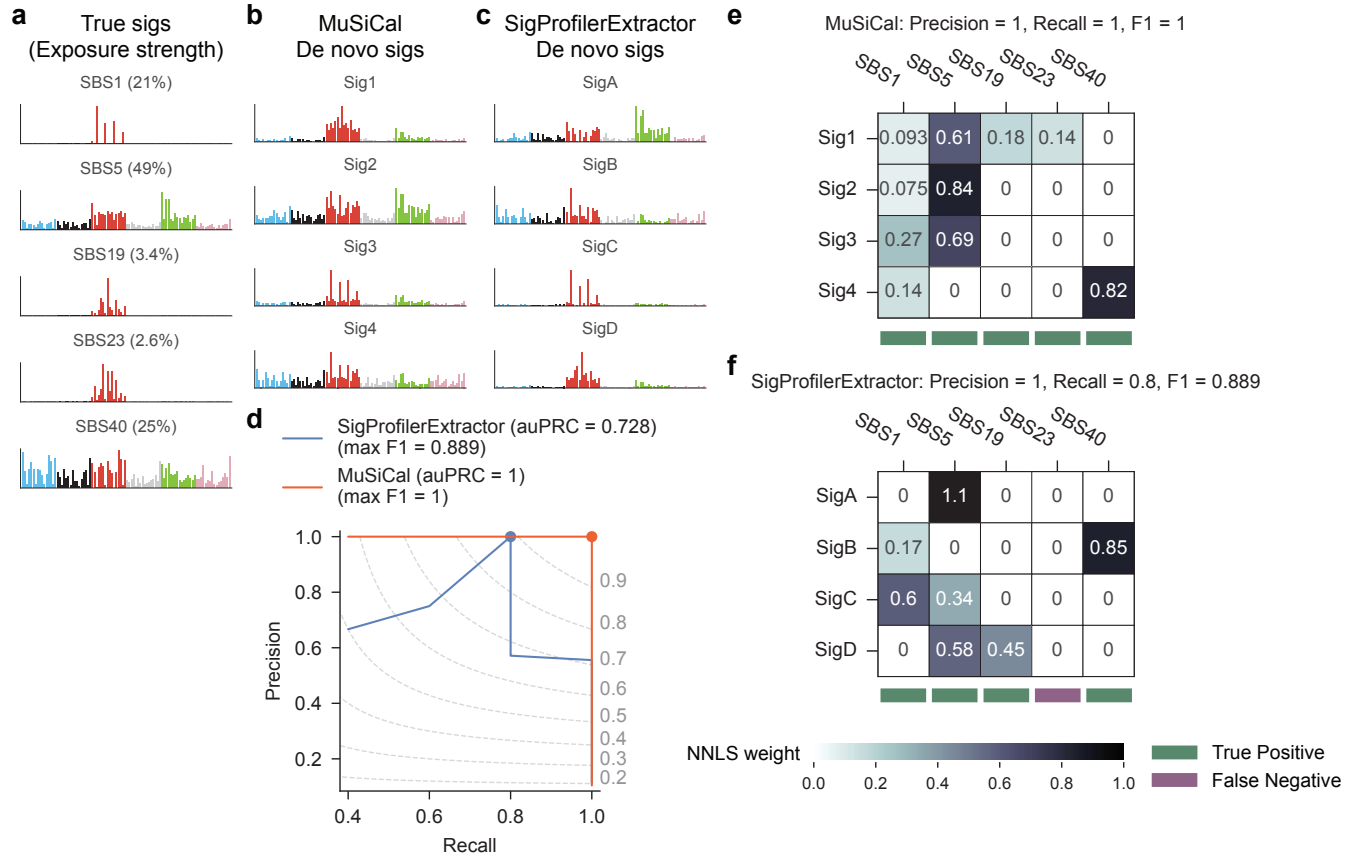

Supplementary Data Fig. 3 Same as Fig. 3a, but for CNS-PiloAstro.

## Panc-AdenoCA

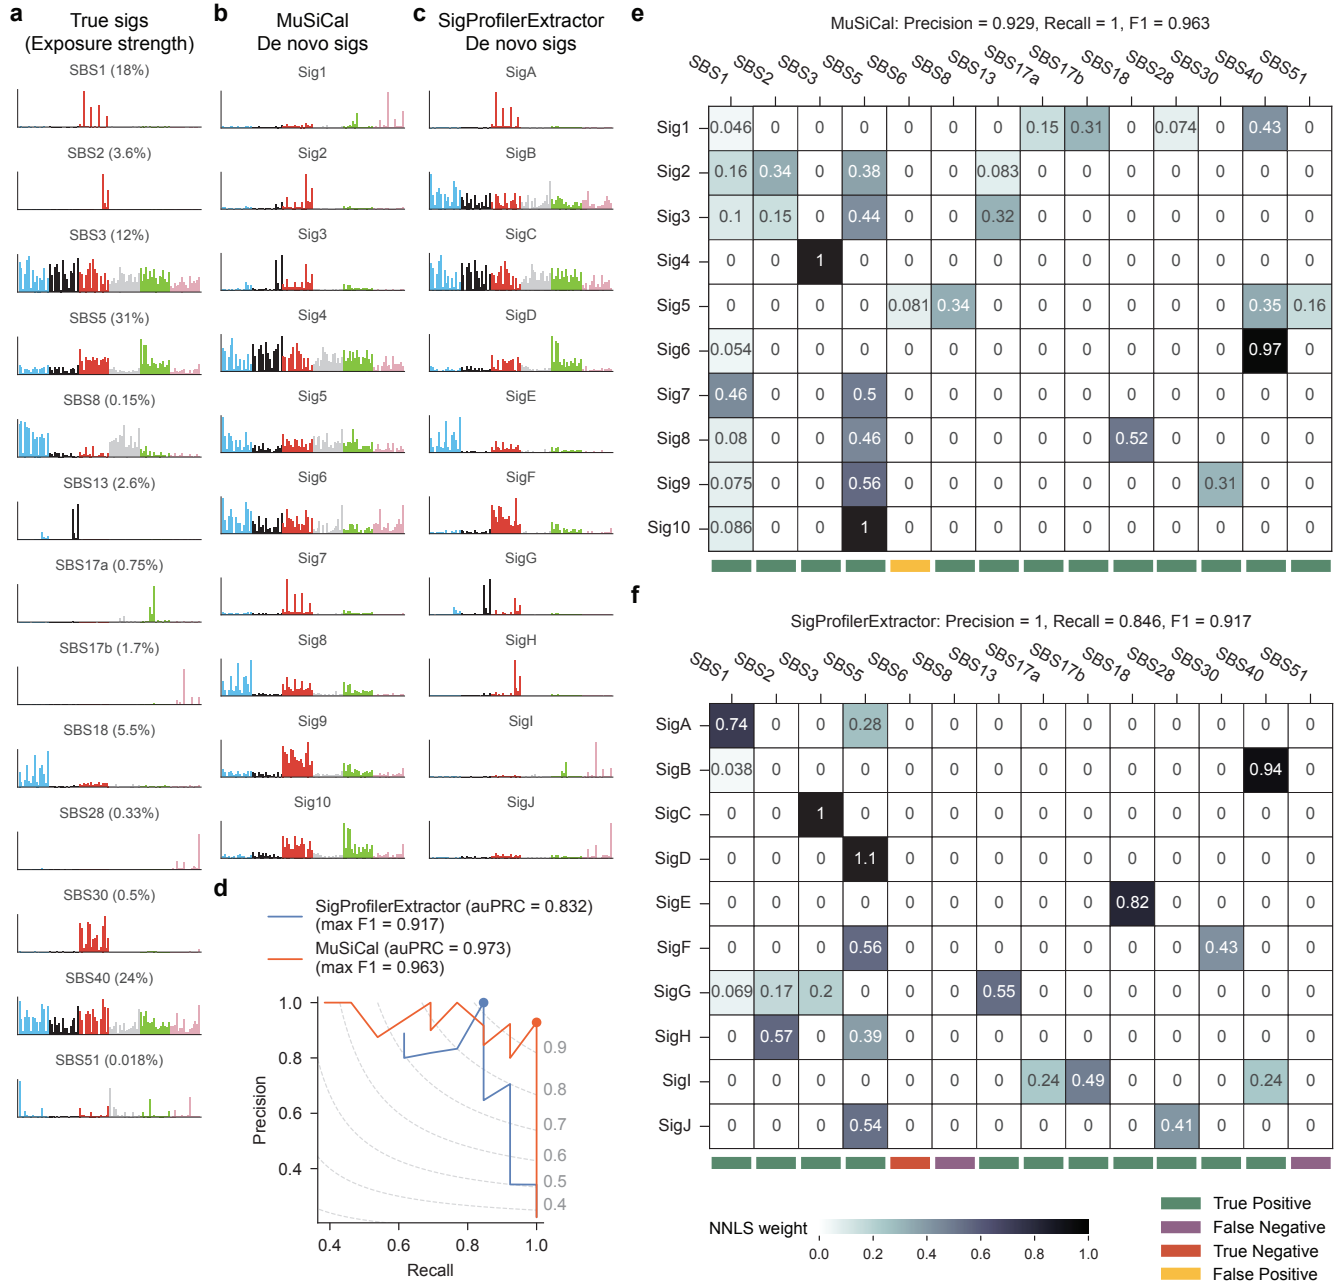

Supplementary Data Fig. 4 Same as Fig. 3a, but for Panc-AdenoCA.

## CNS-Medullo

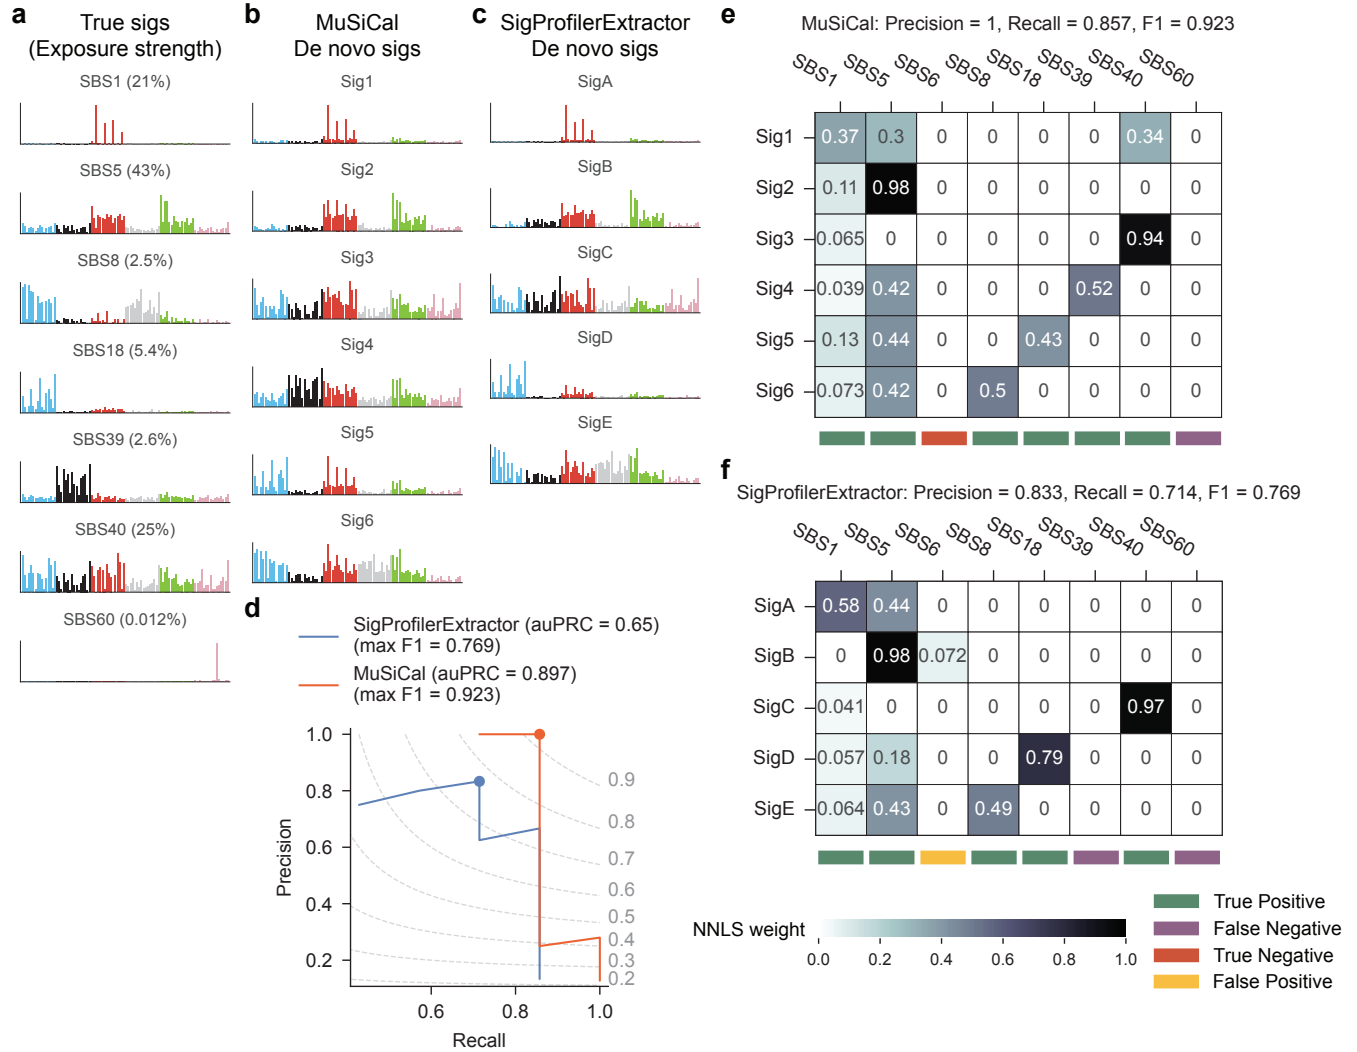

Supplementary Data Fig. 5 Same as Fig. 3a, but for CNS-Medullo.

## Lymph-BNHL

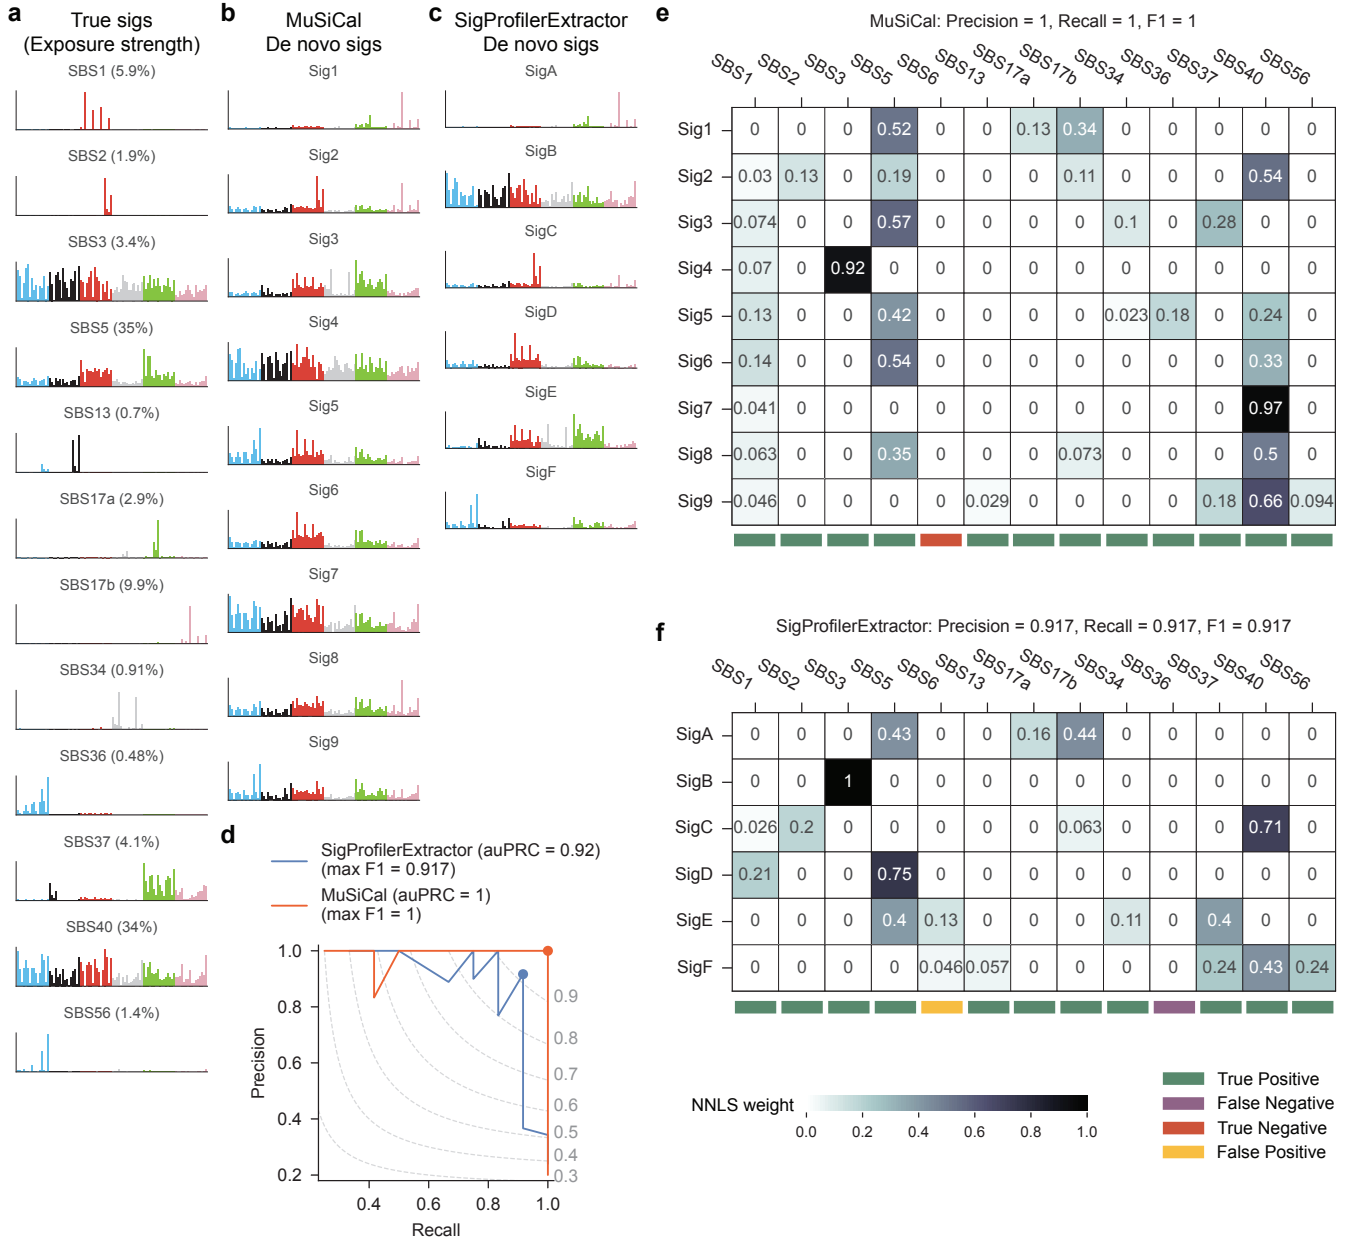

Supplementary Data Fig. 6 Same as Fig. 3a, but for Lymph-BNHL.

## Prost-AdenoCA

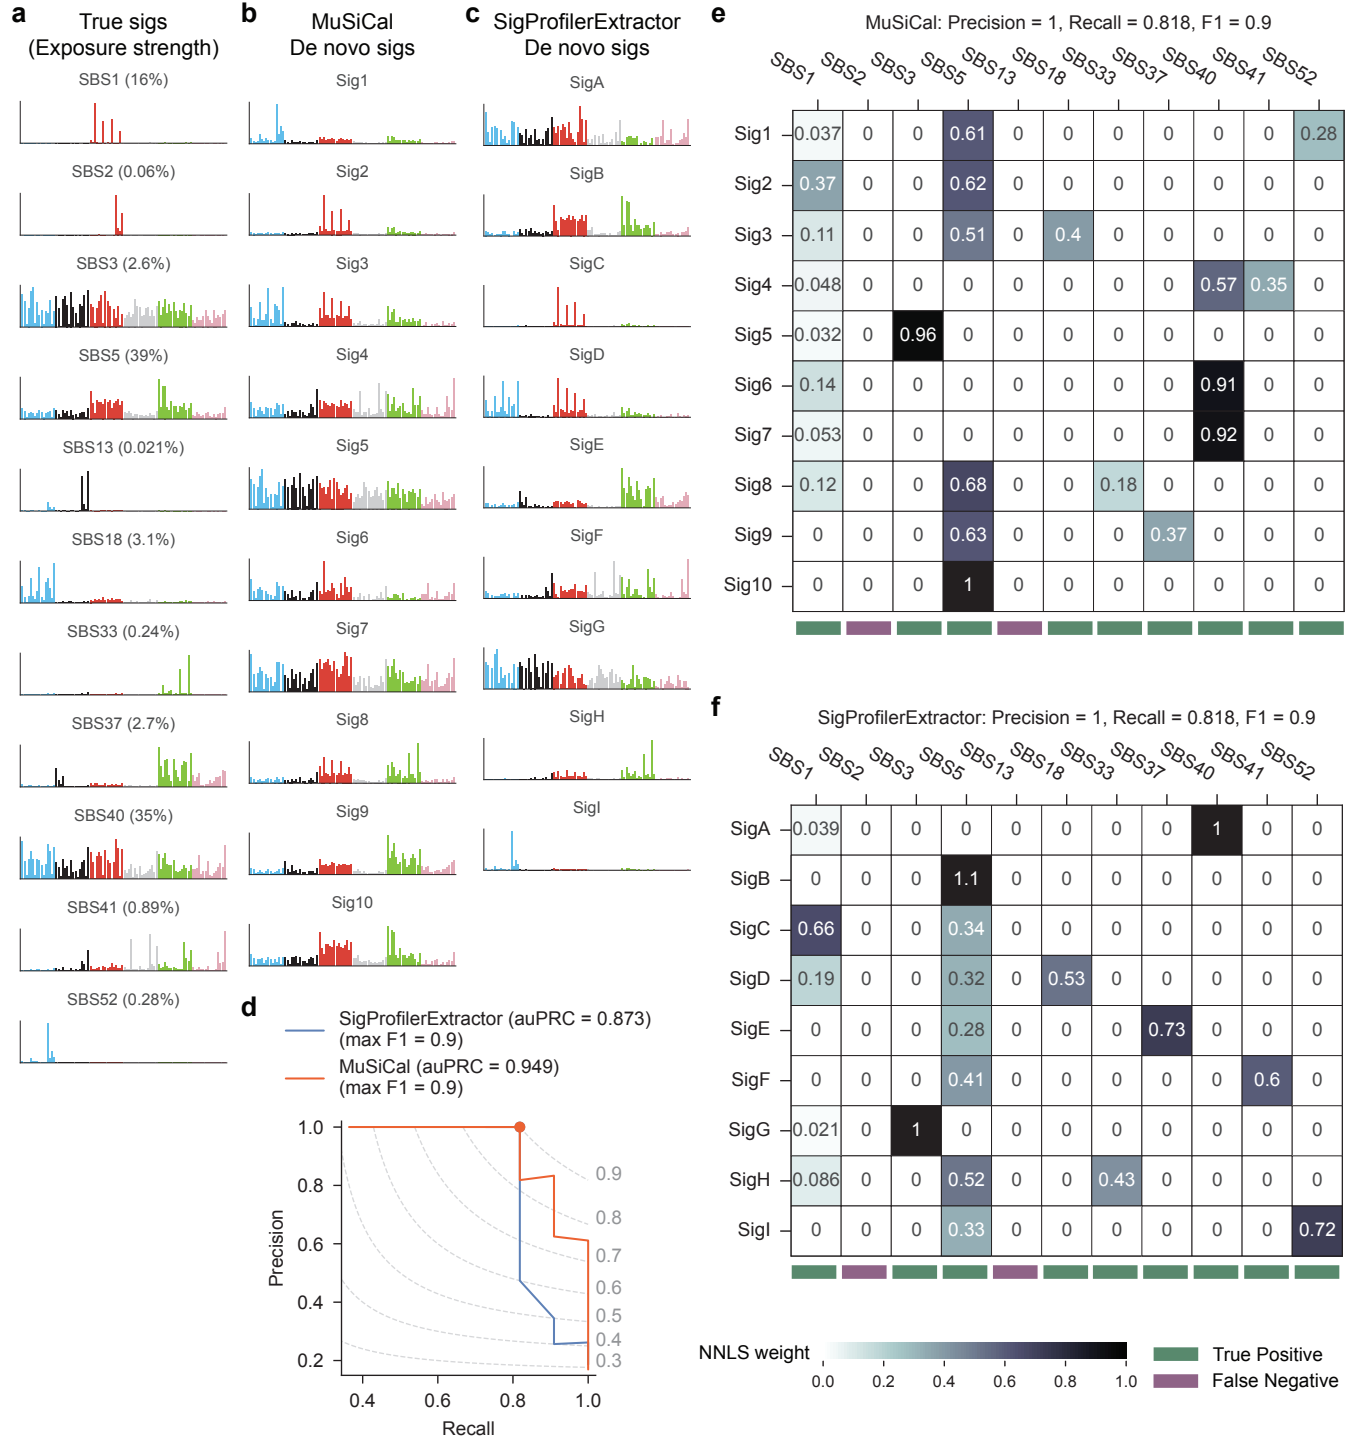

Supplementary Data Fig. 7 Same as Fig. 3a, but for Prost-AdenoCA.



## Lung-AdenoCA

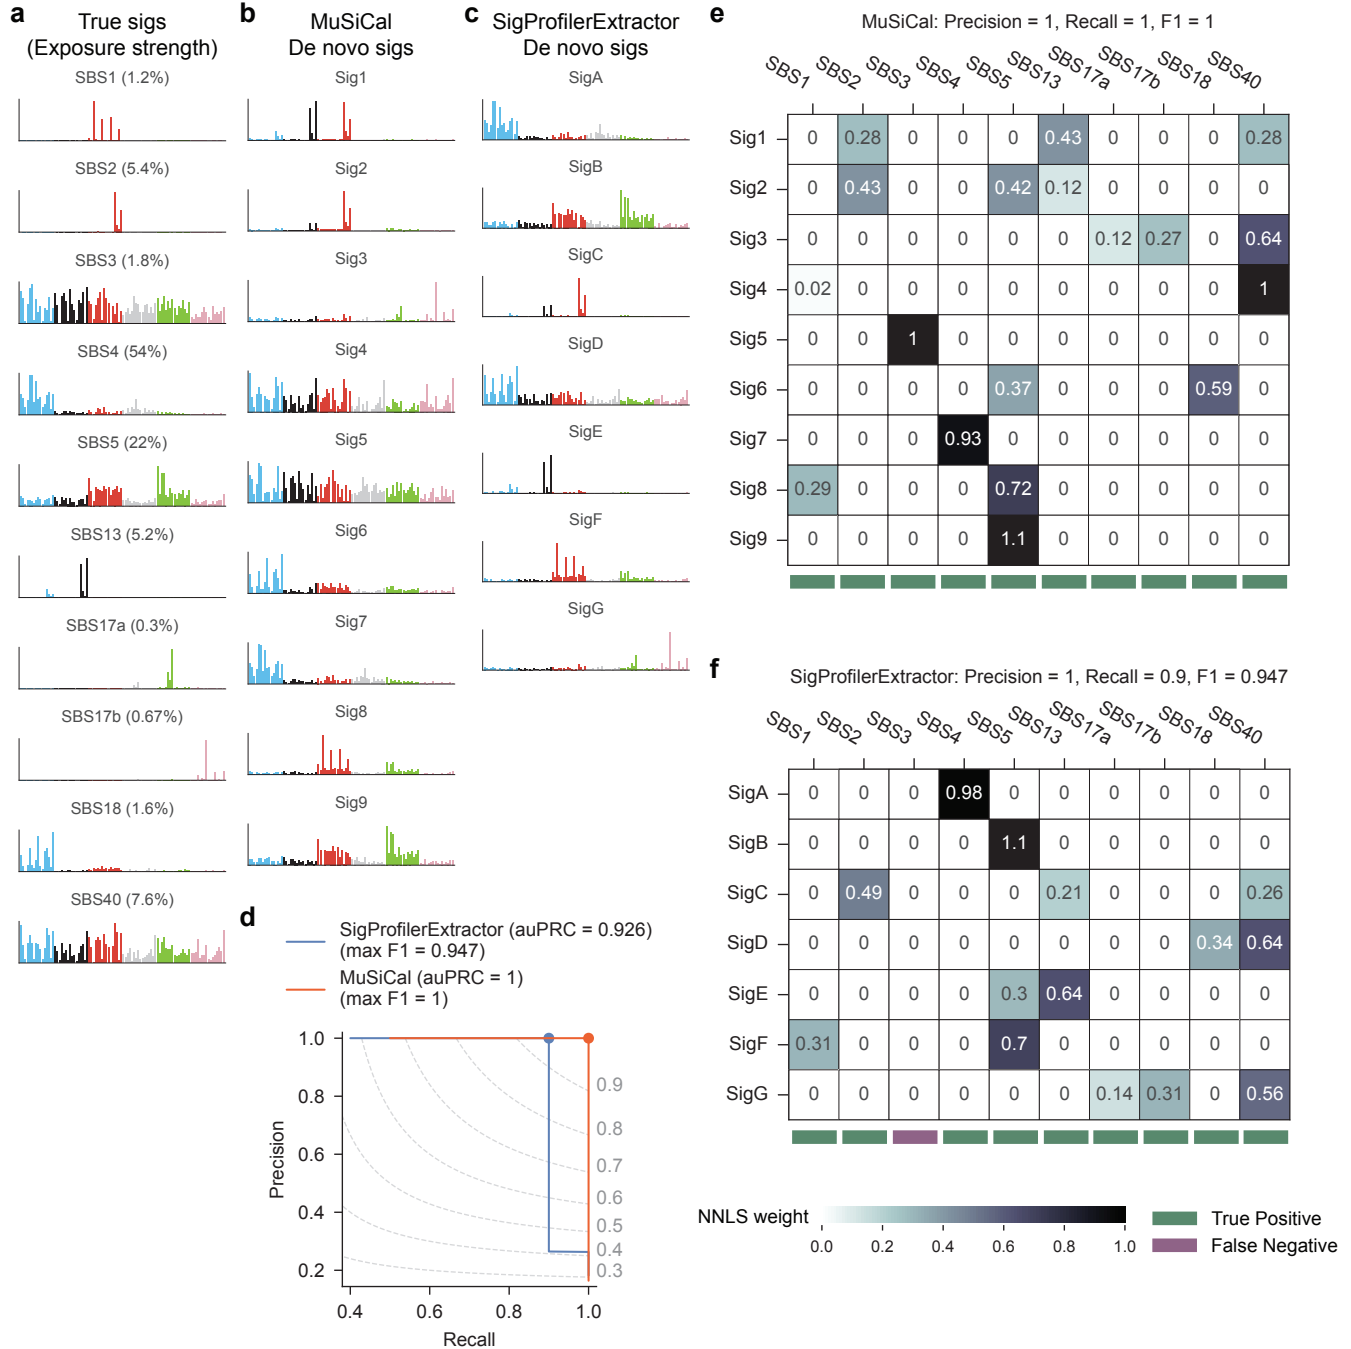

Supplementary Data Fig. 8 Same as Fig. 3a, but for Lung-AdenoCA.

Bone-Osteosarc

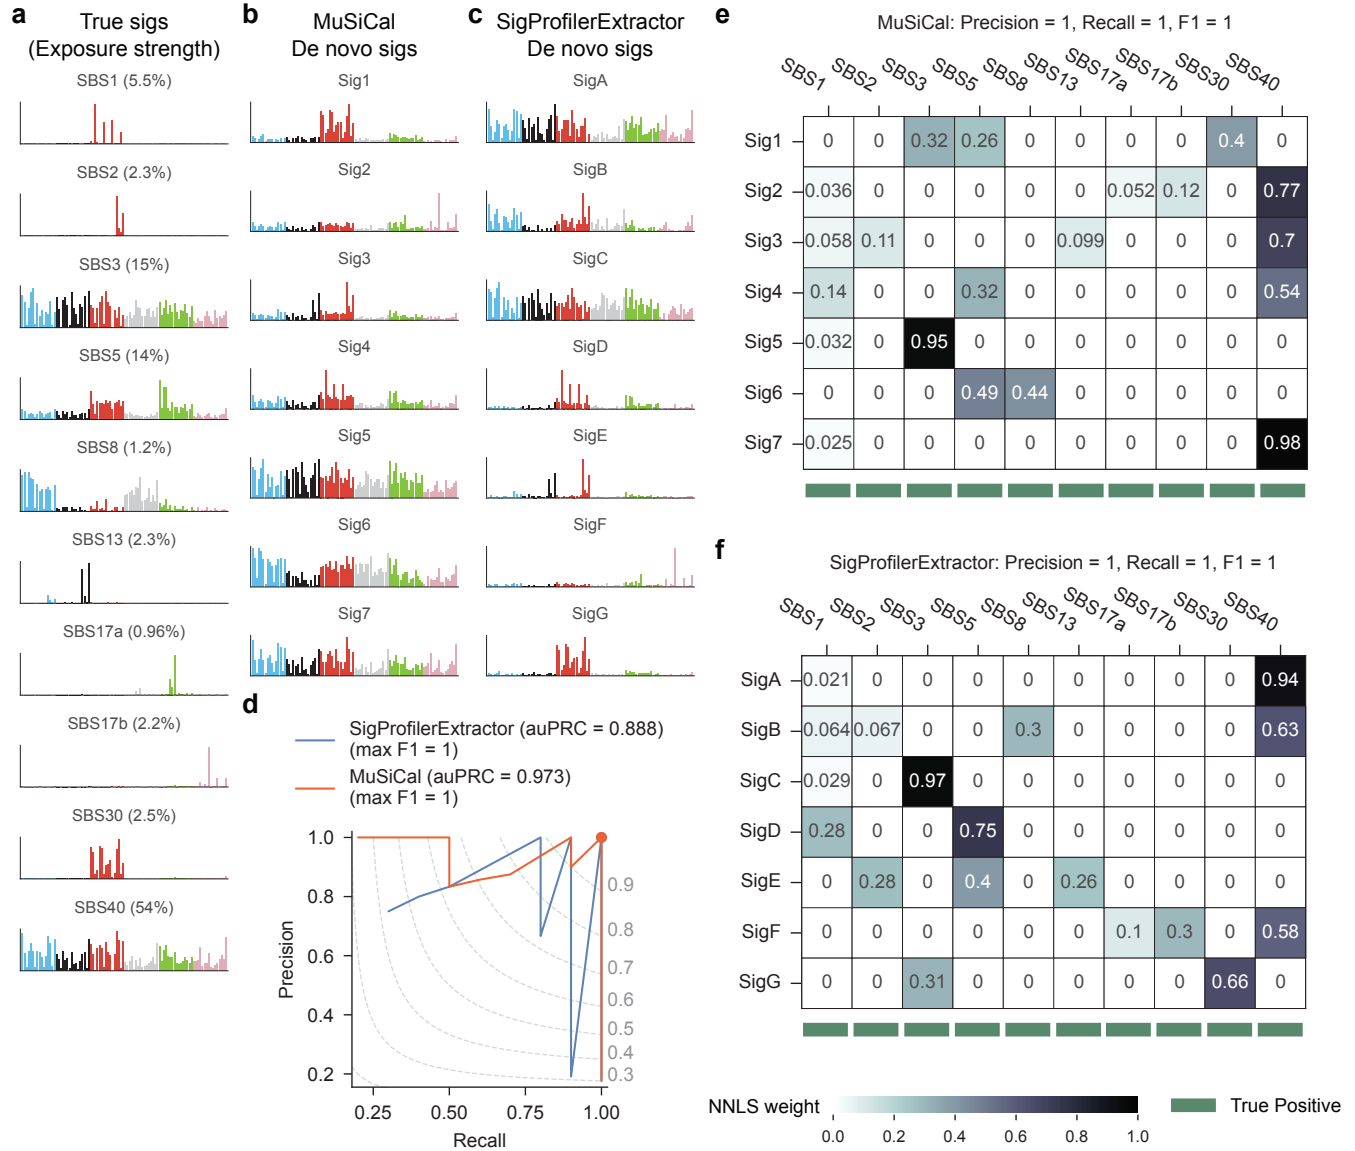

Supplementary Data Fig. 9 Same as Fig. 3a, but for Bone-Osteosarc.

Head-SCC

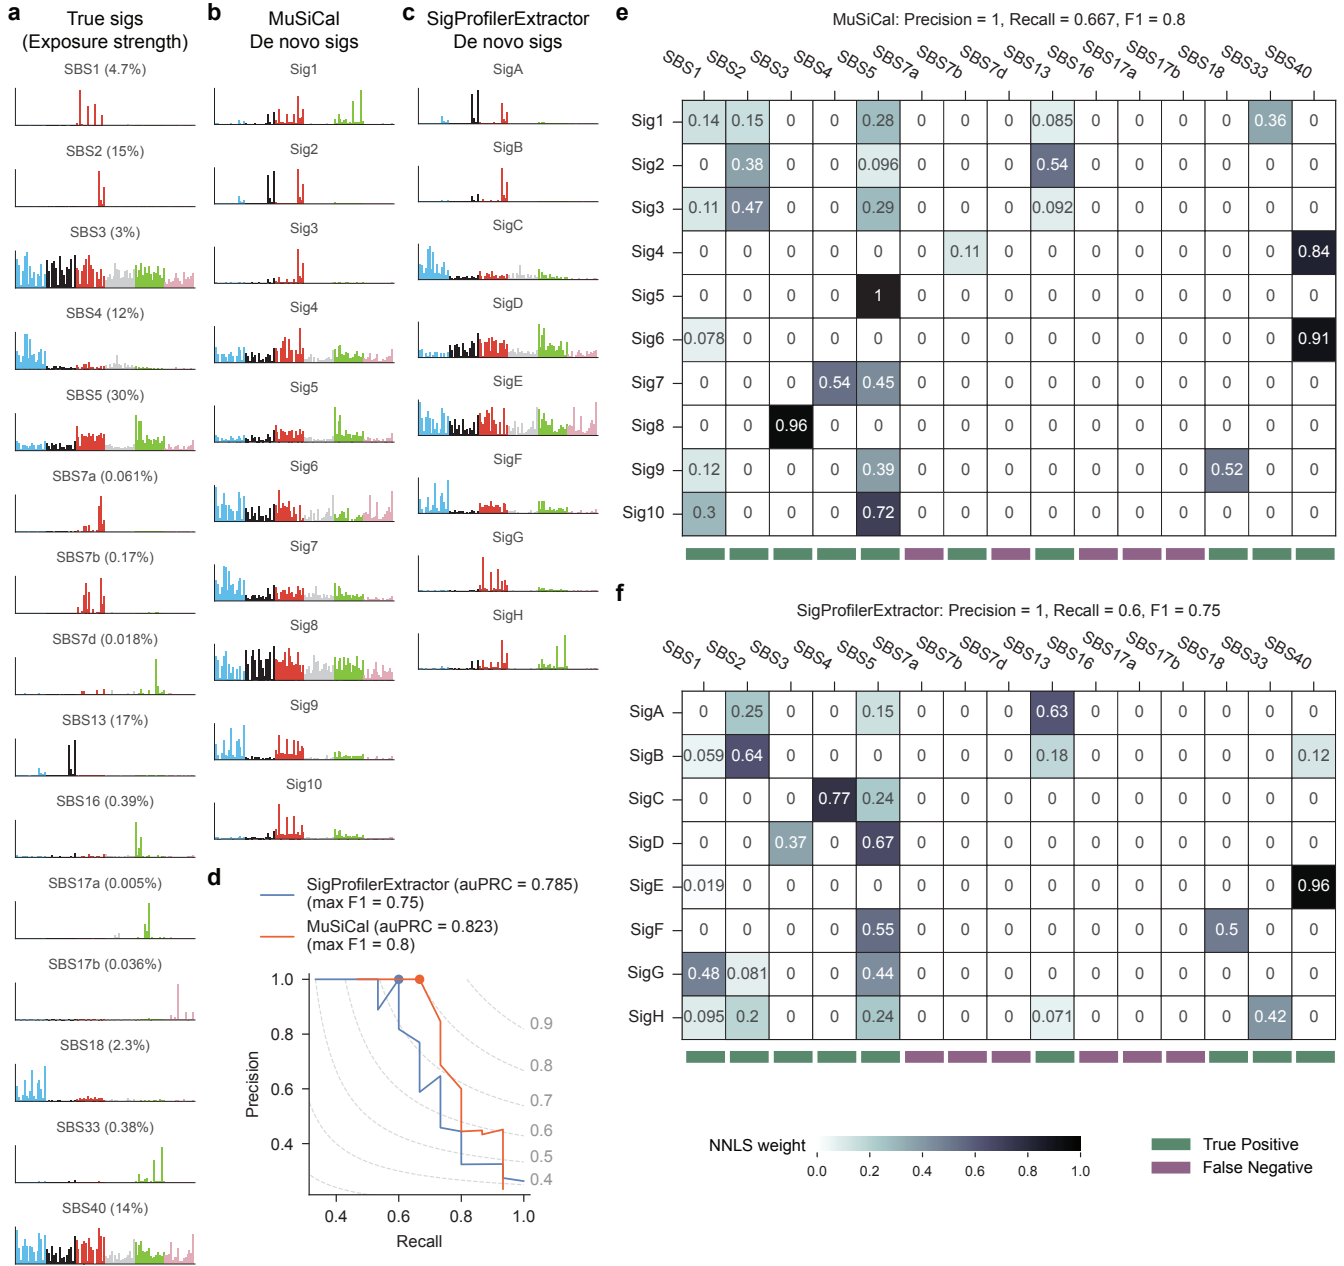

Supplementary Data Fig. 10 Same as Fig. 3a, but for Head-SCC.

Stomach-AdenoCA

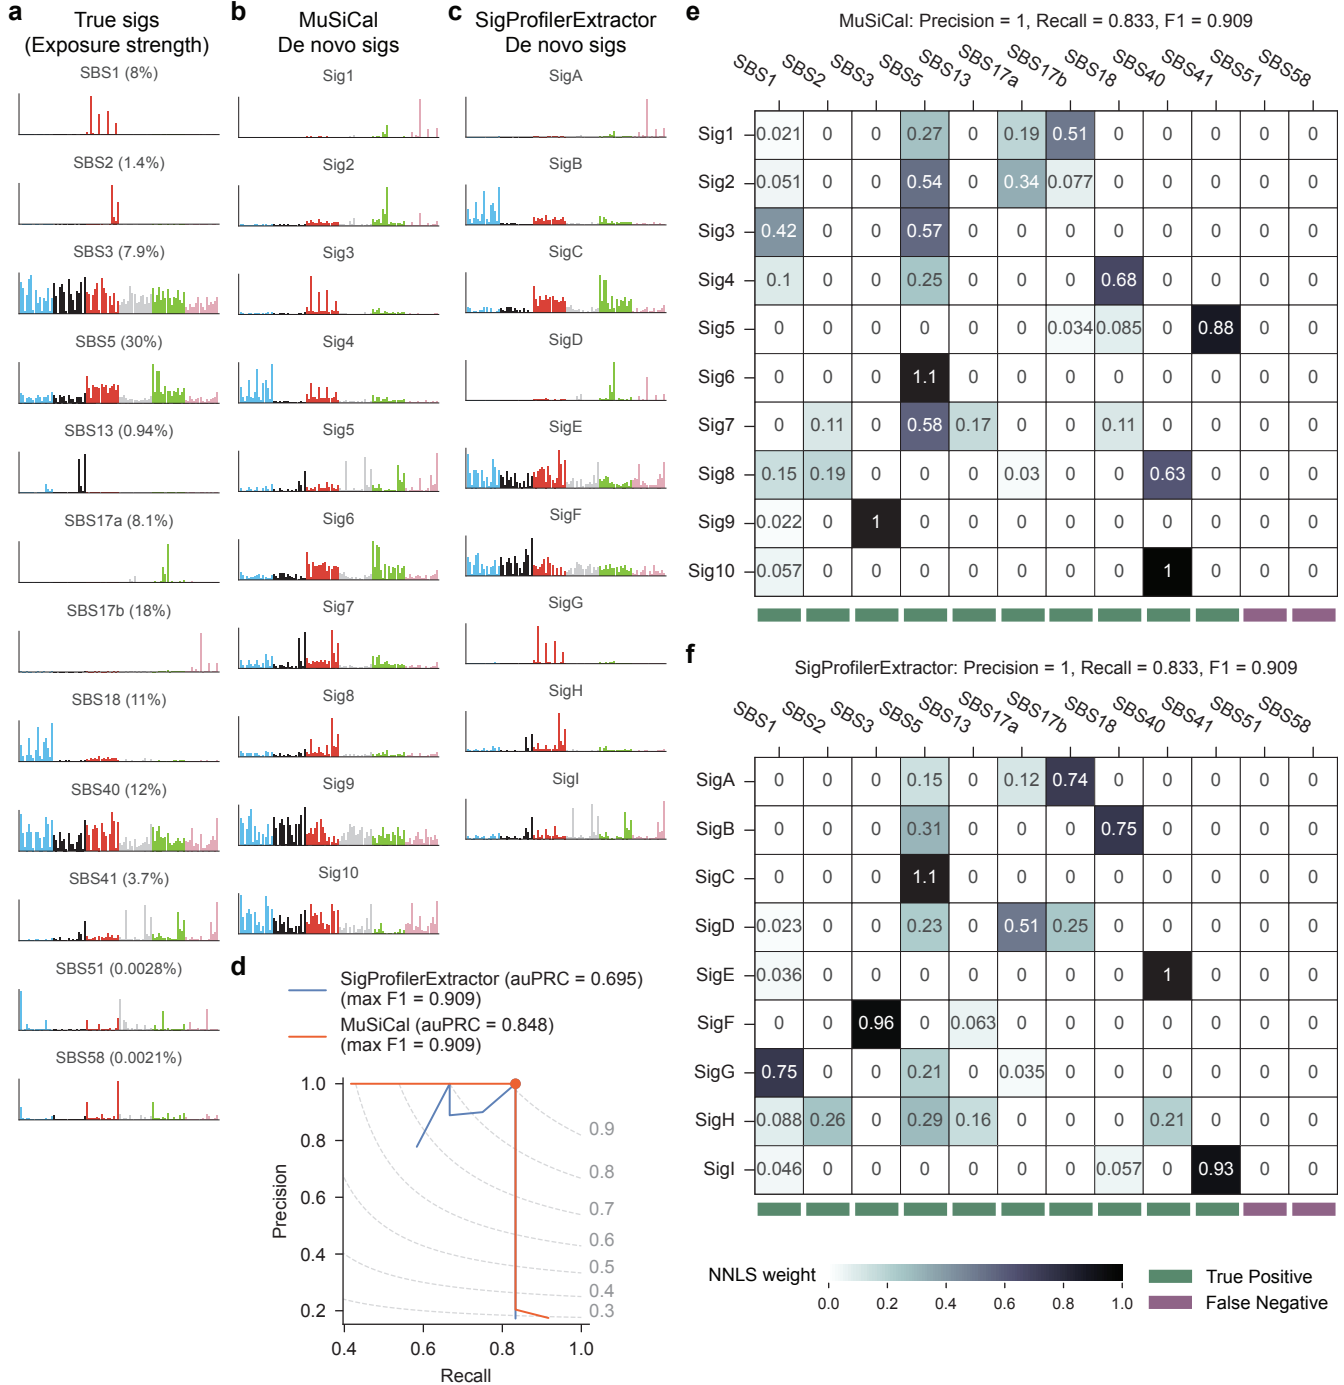

Supplementary Data Fig. 11 Same as Fig. 3a, but for Stomach-AdenoCA.

Panc-Endocrine

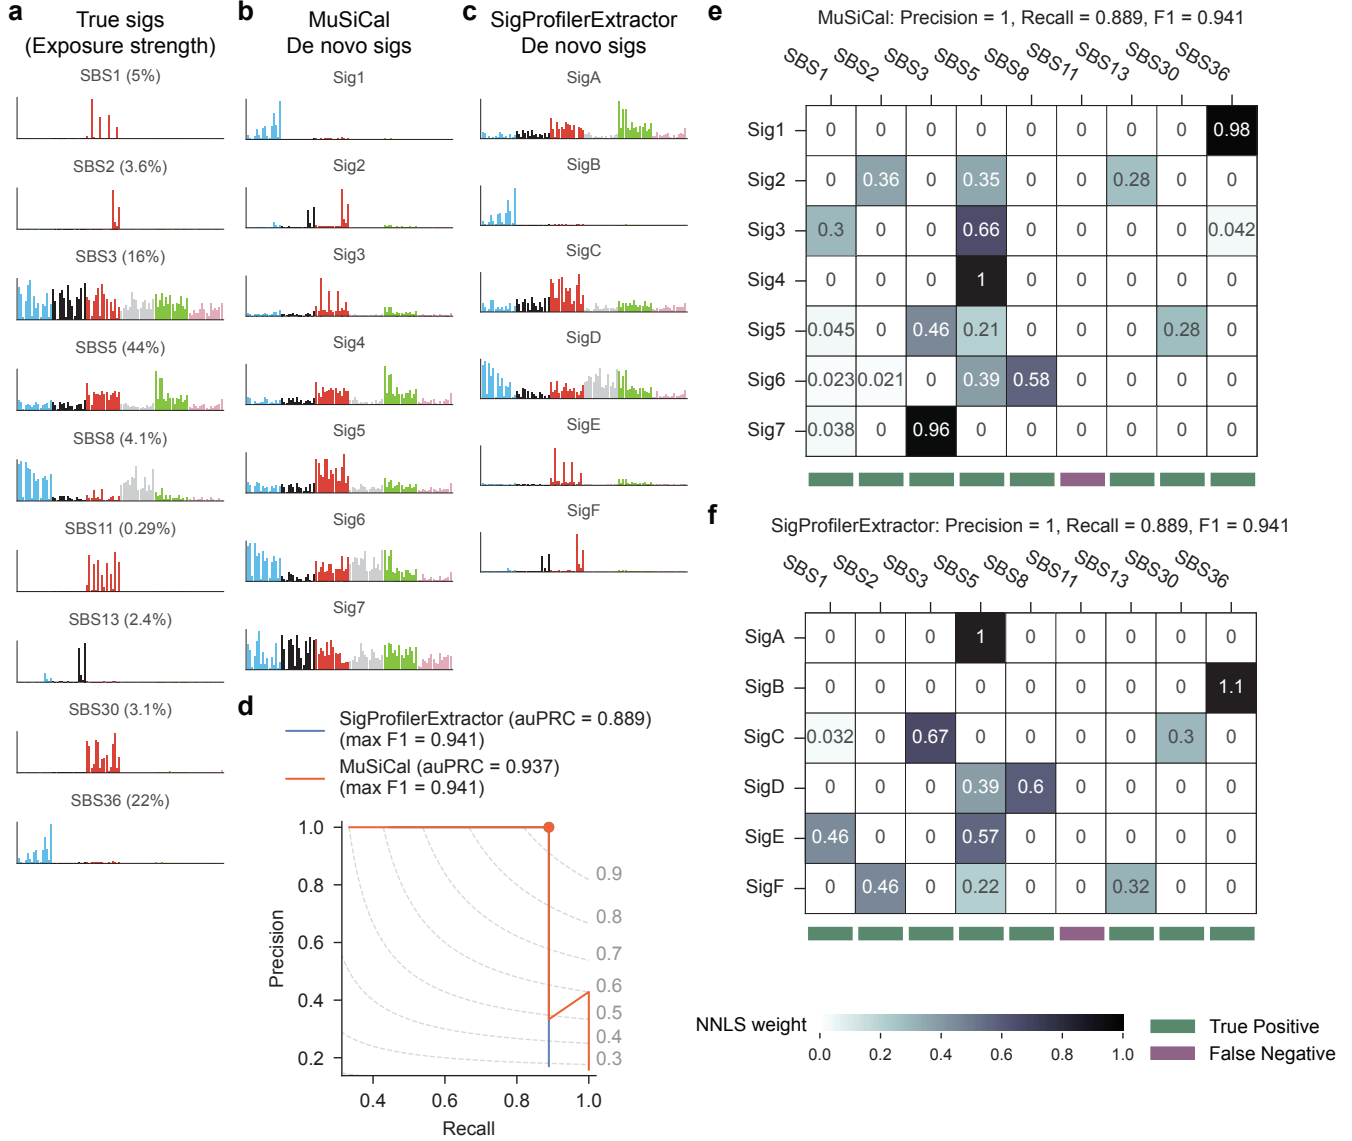

Supplementary Data Fig. 12 Same as Fig. 3a, but for Panc-Endocrine.

Kidney-ChRCC

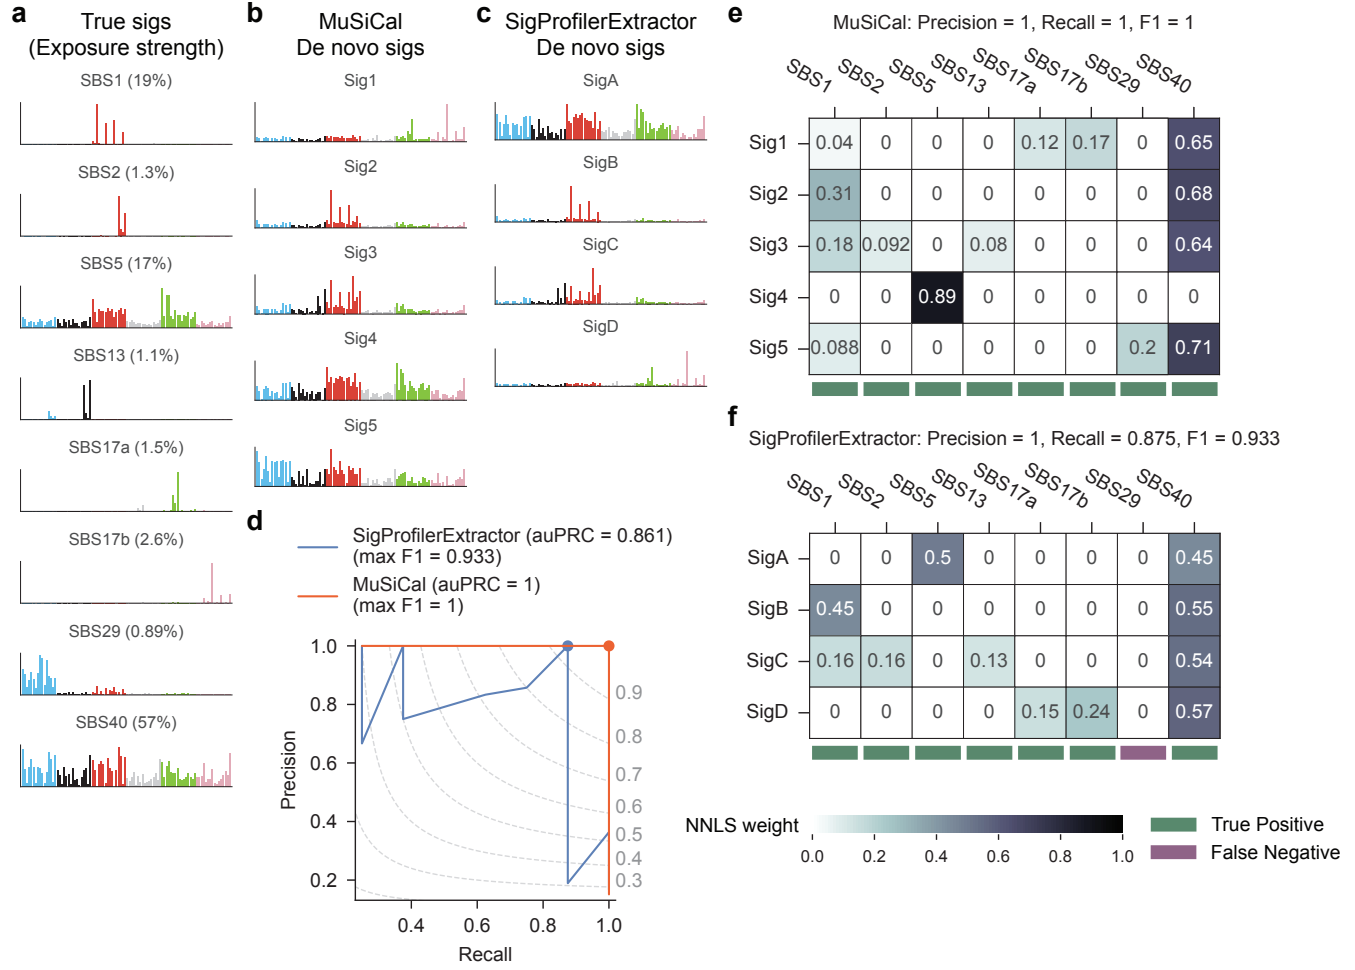

Supplementary Data Fig. 13 Same as Fig. 3a, but for Kidney-ChRCC.

ColoRect-AdenoCA

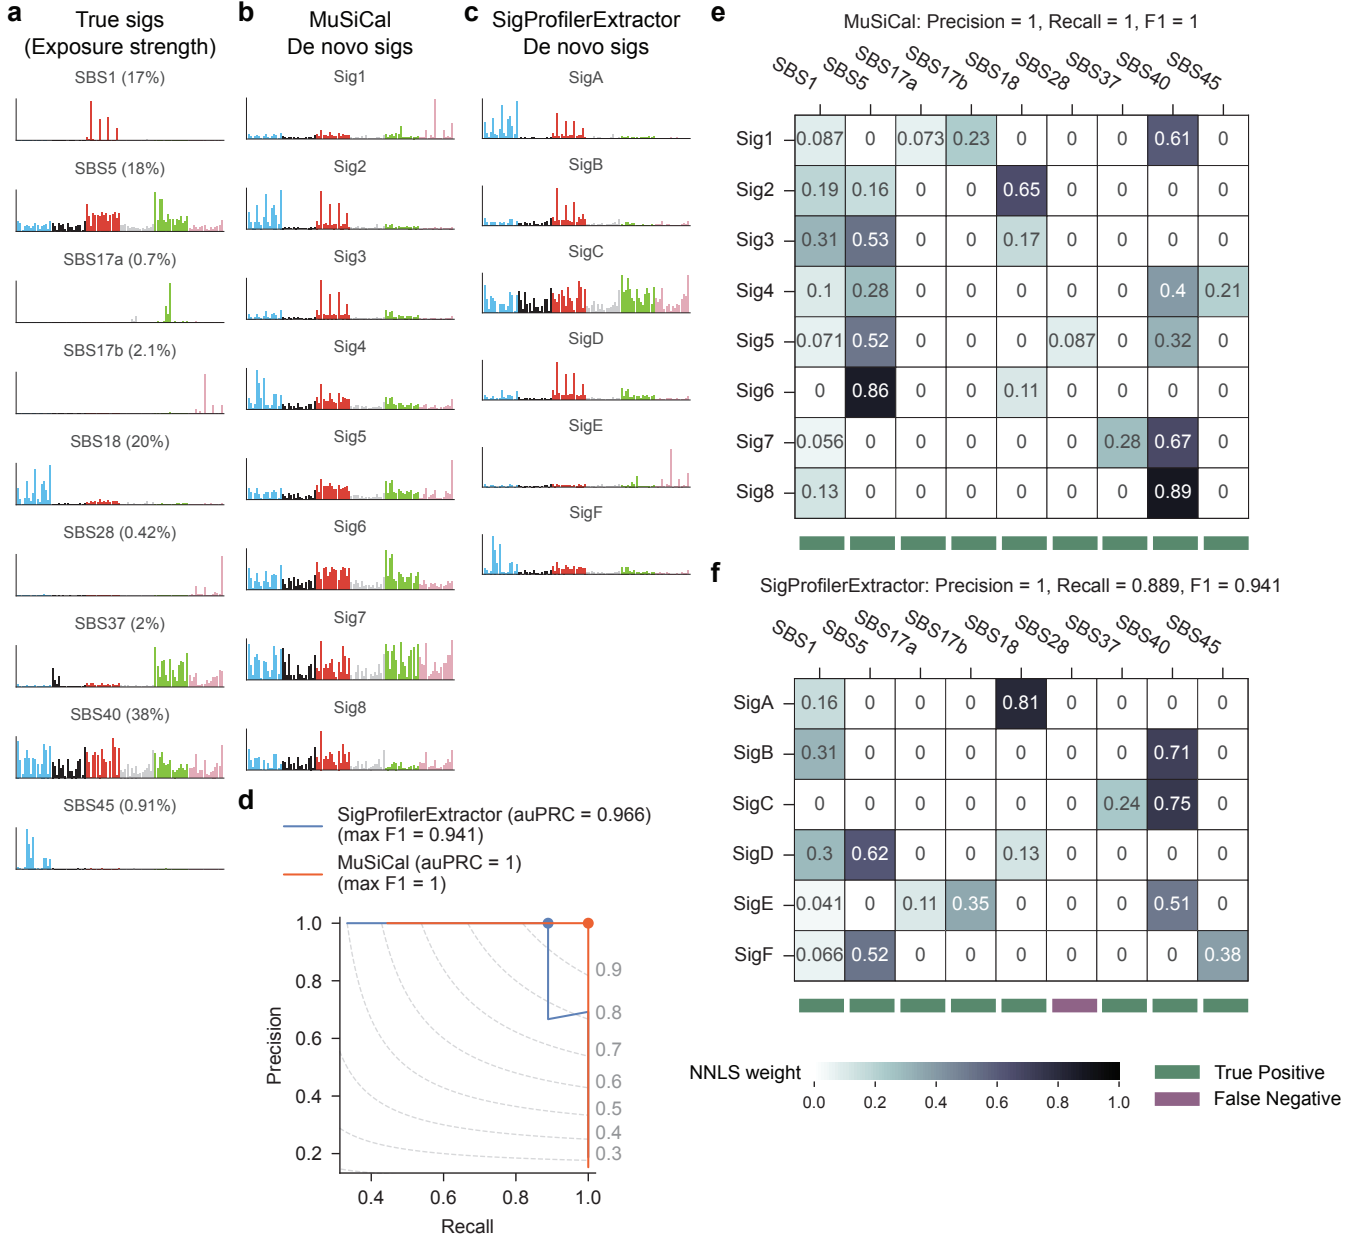

Supplementary Data Fig. 14 Same as Fig. 3a, but for ColoRect-AdenoCA.

Liver-HCC

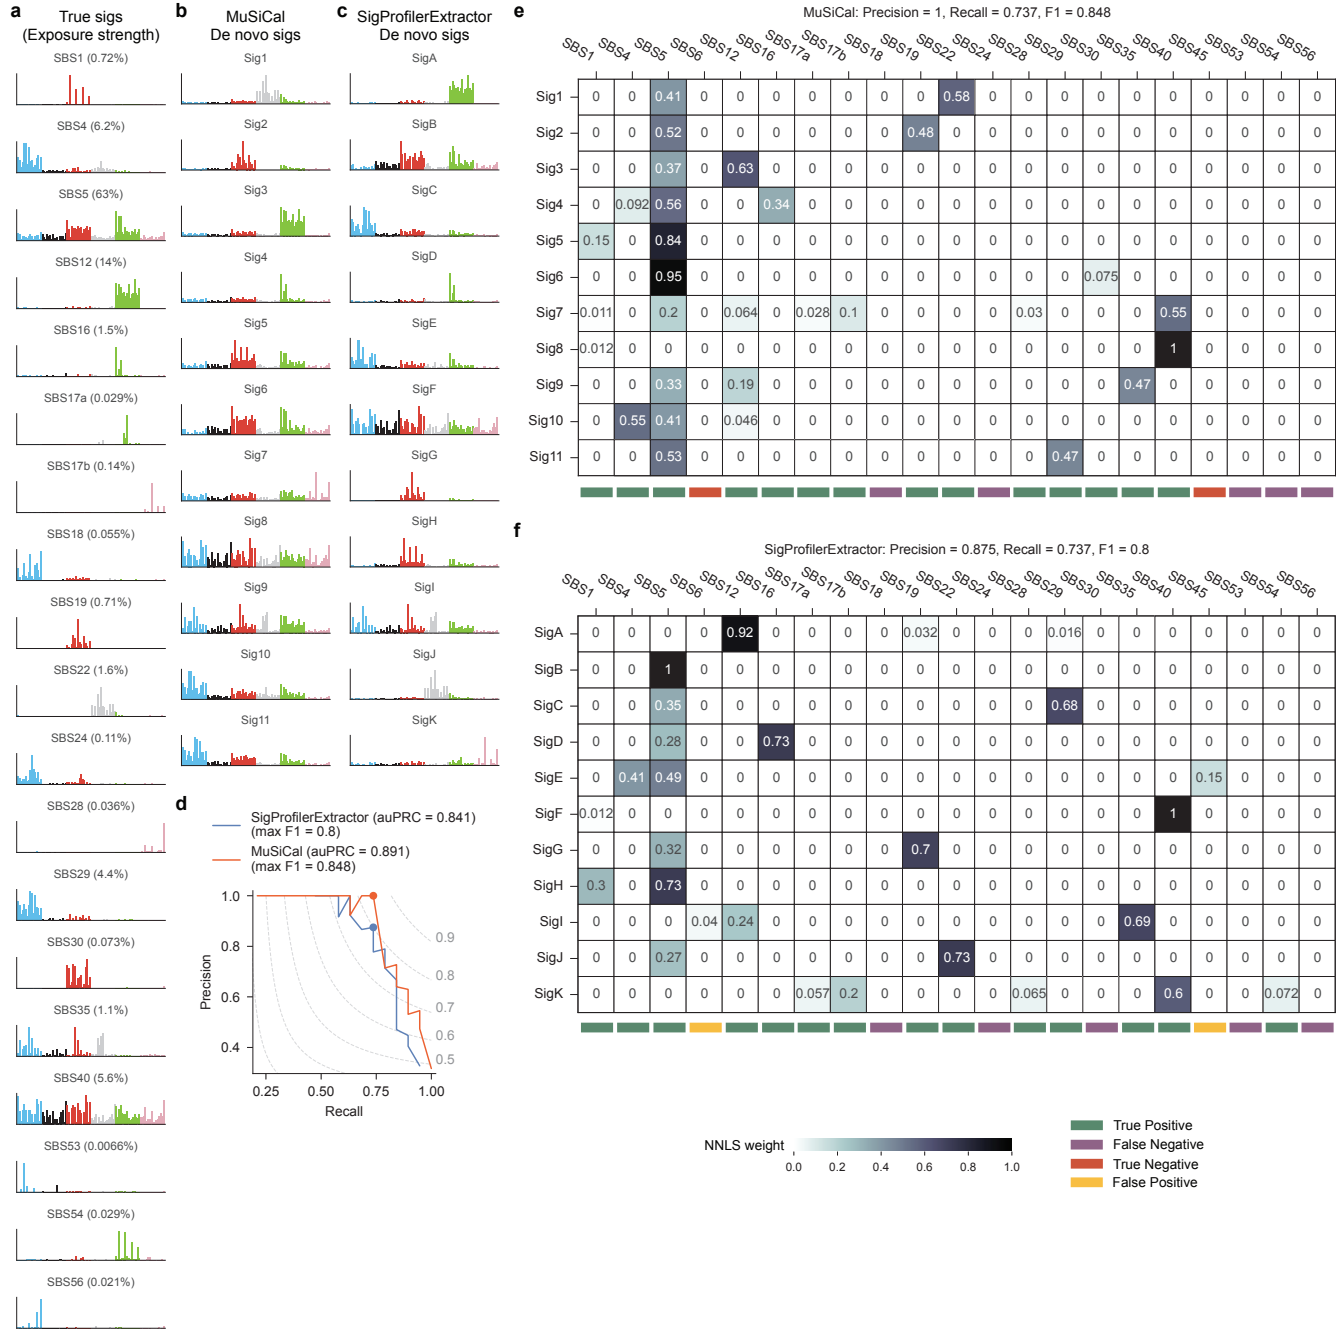

Supplementary Data Fig. 15 Same as Fig. 3a, but for Liver-HCC.



Thy-AdenoCA

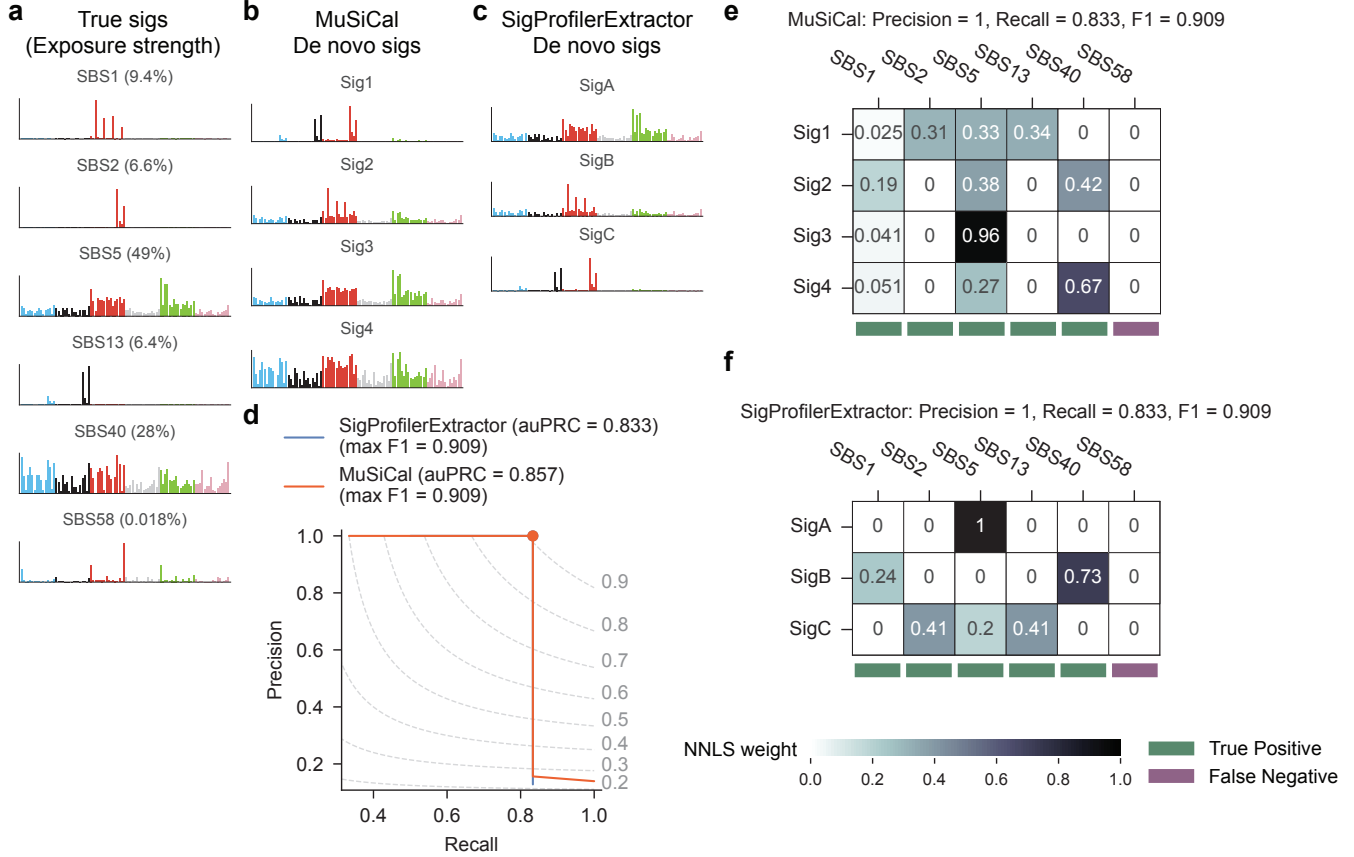

Supplementary Data Fig. 16 Same as Fig. 3a, but for Thy-AdenoCA.

Eso-AdenoCA

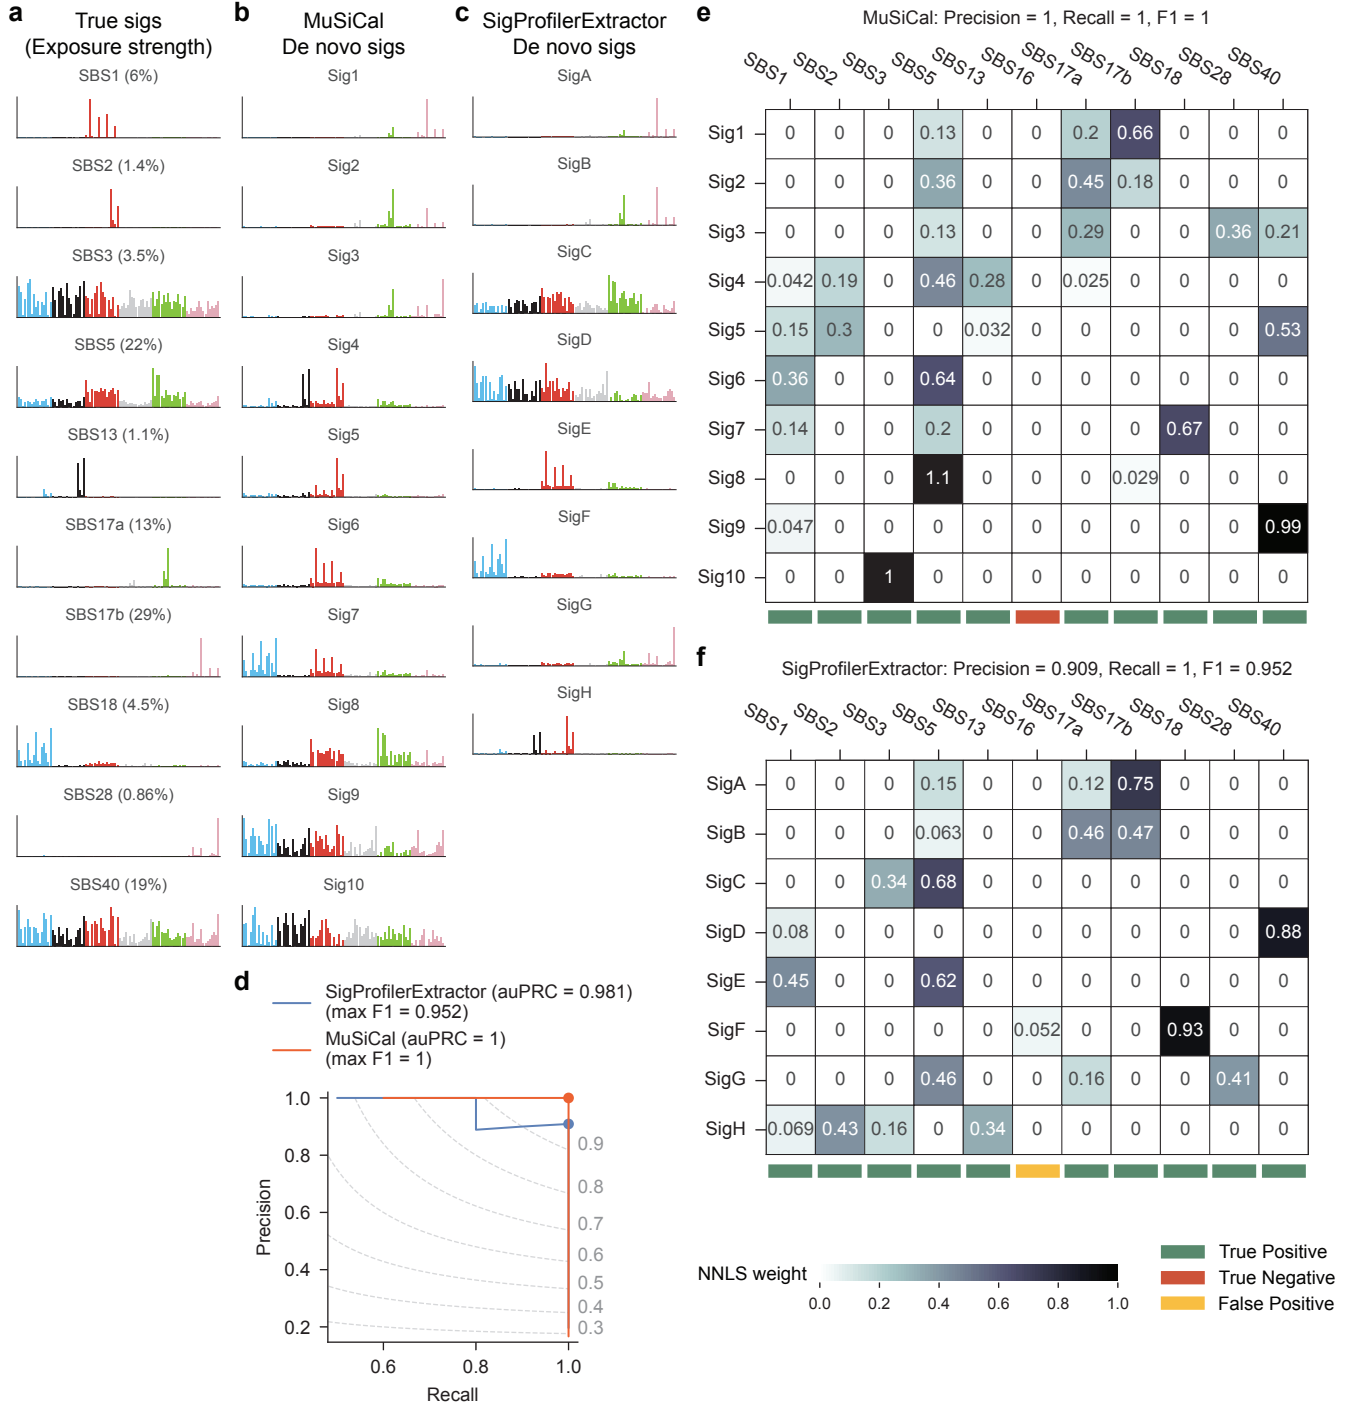

Supplementary Data Fig. 17 Same as Fig. 3a, but for Eso-AdenoCA.

Lymph-CLL

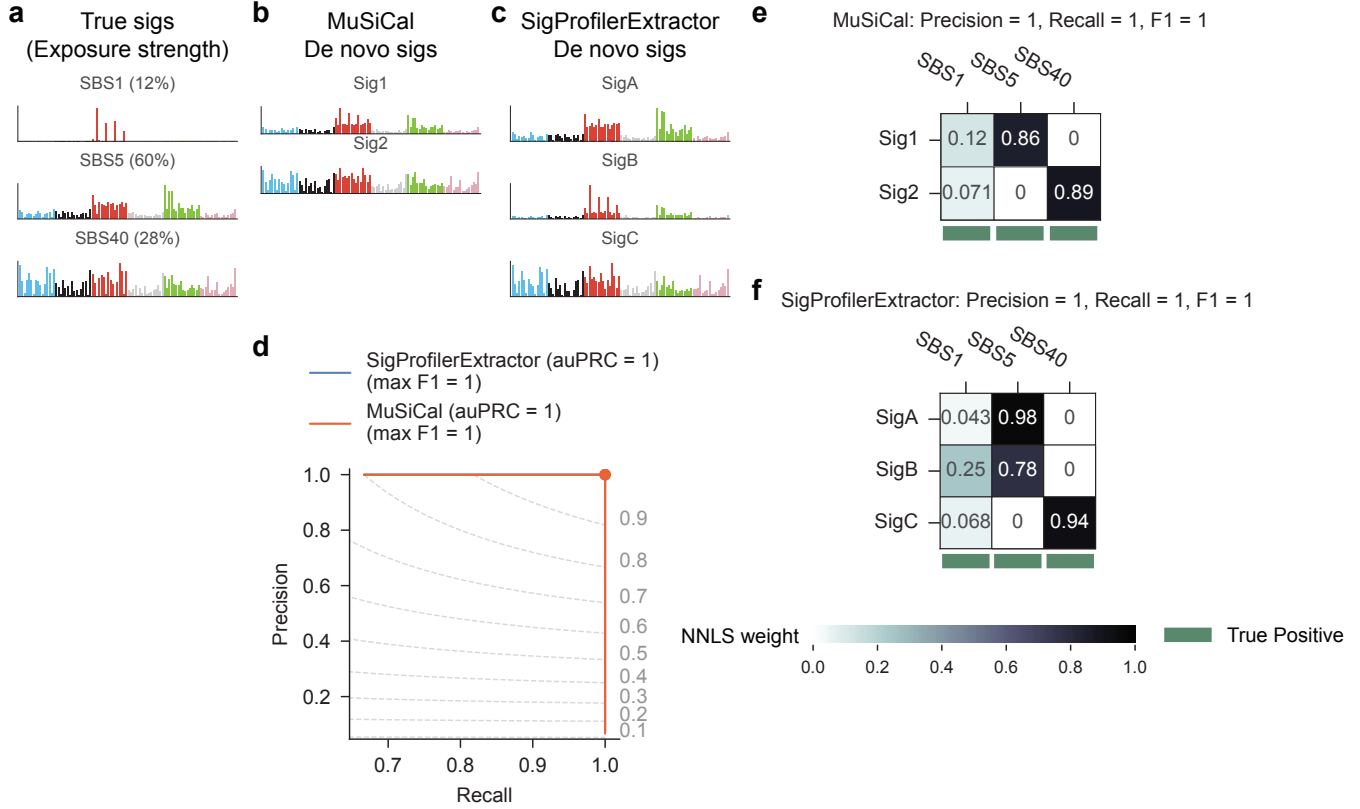

Supplementary Data Fig. 18 Same as Fig. 3a, but for Lymph-CLL.

Uterus-AdenoCA

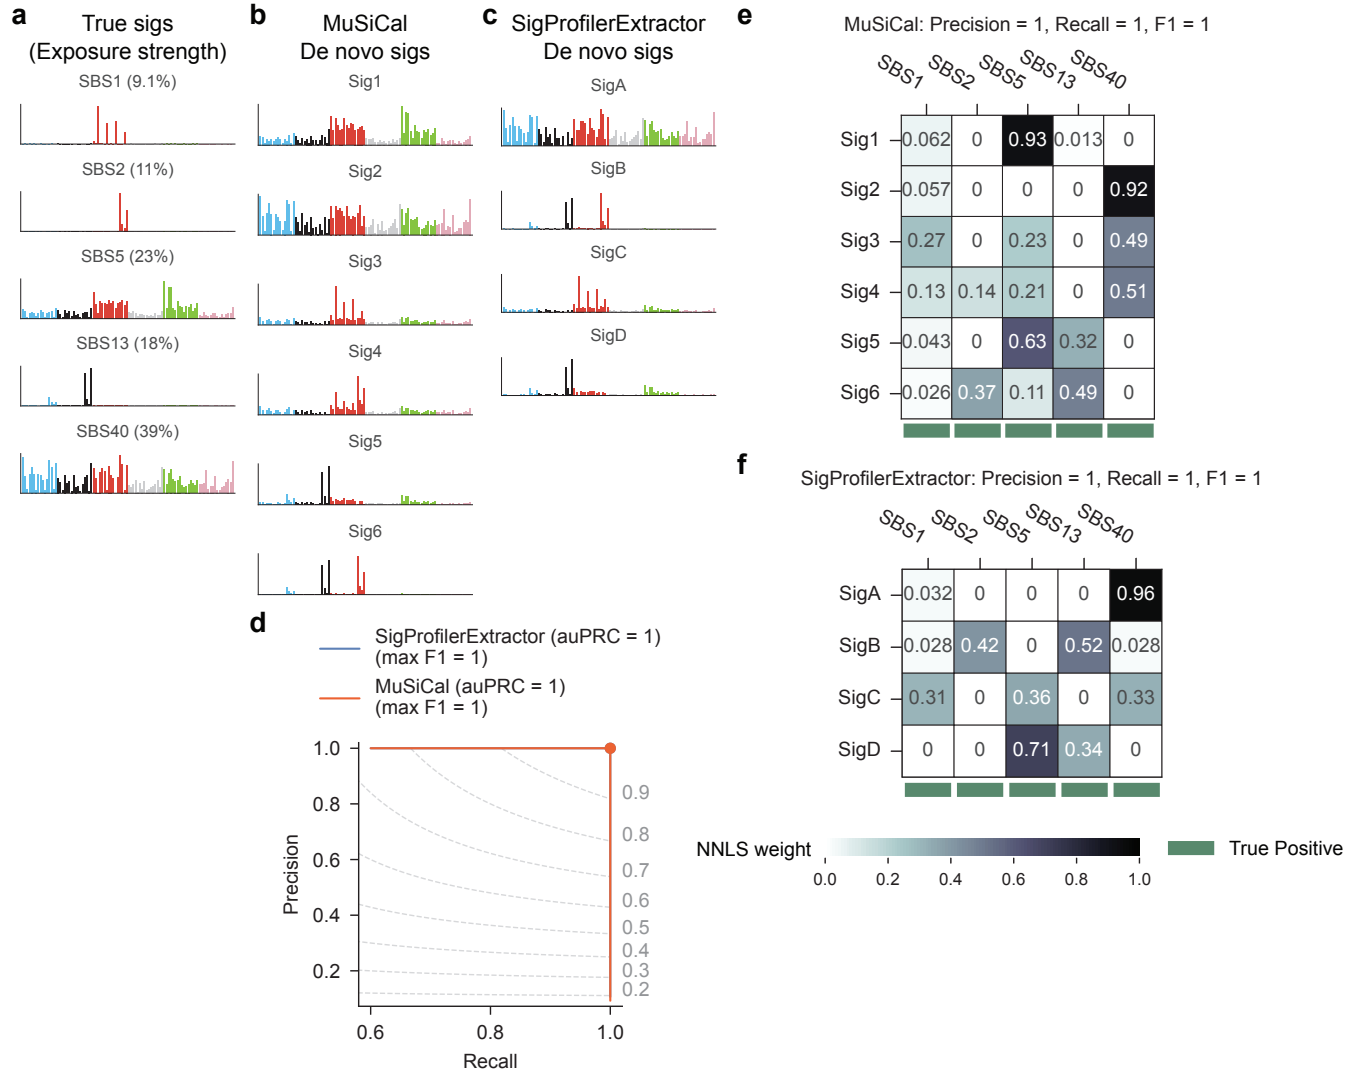

Supplementary Data Fig. 19 Same as Fig. 3a, but for Uterus-AdenoCA.

Ovary-AdenoCA

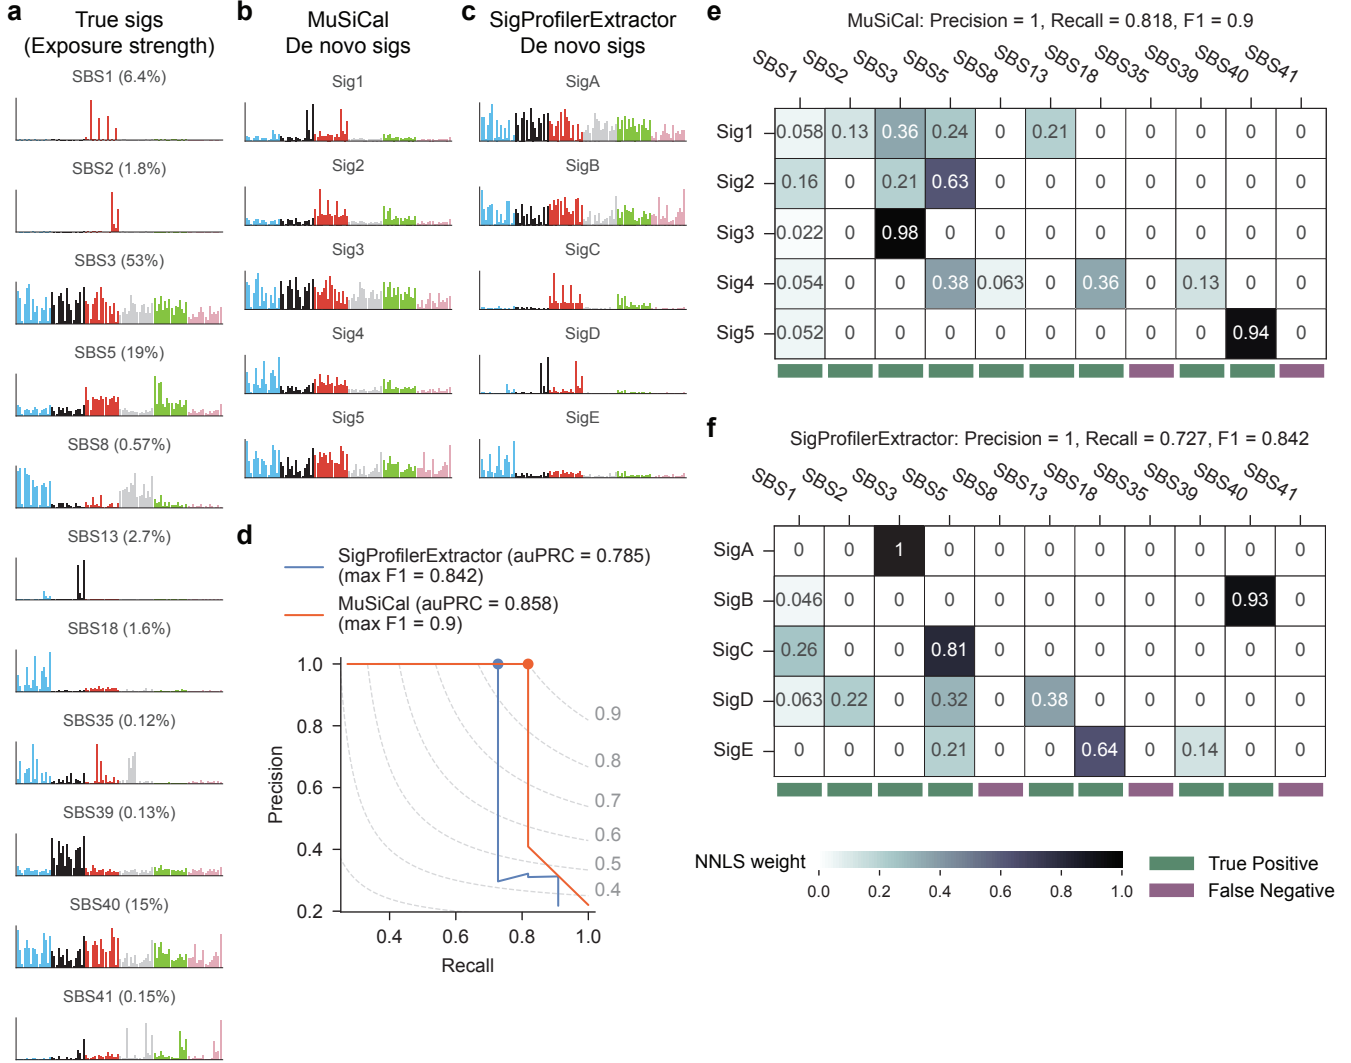

Supplementary Data Fig. 20 Same as Fig. 3a, but for Ovary-AdenoCA.

Lung-SCC

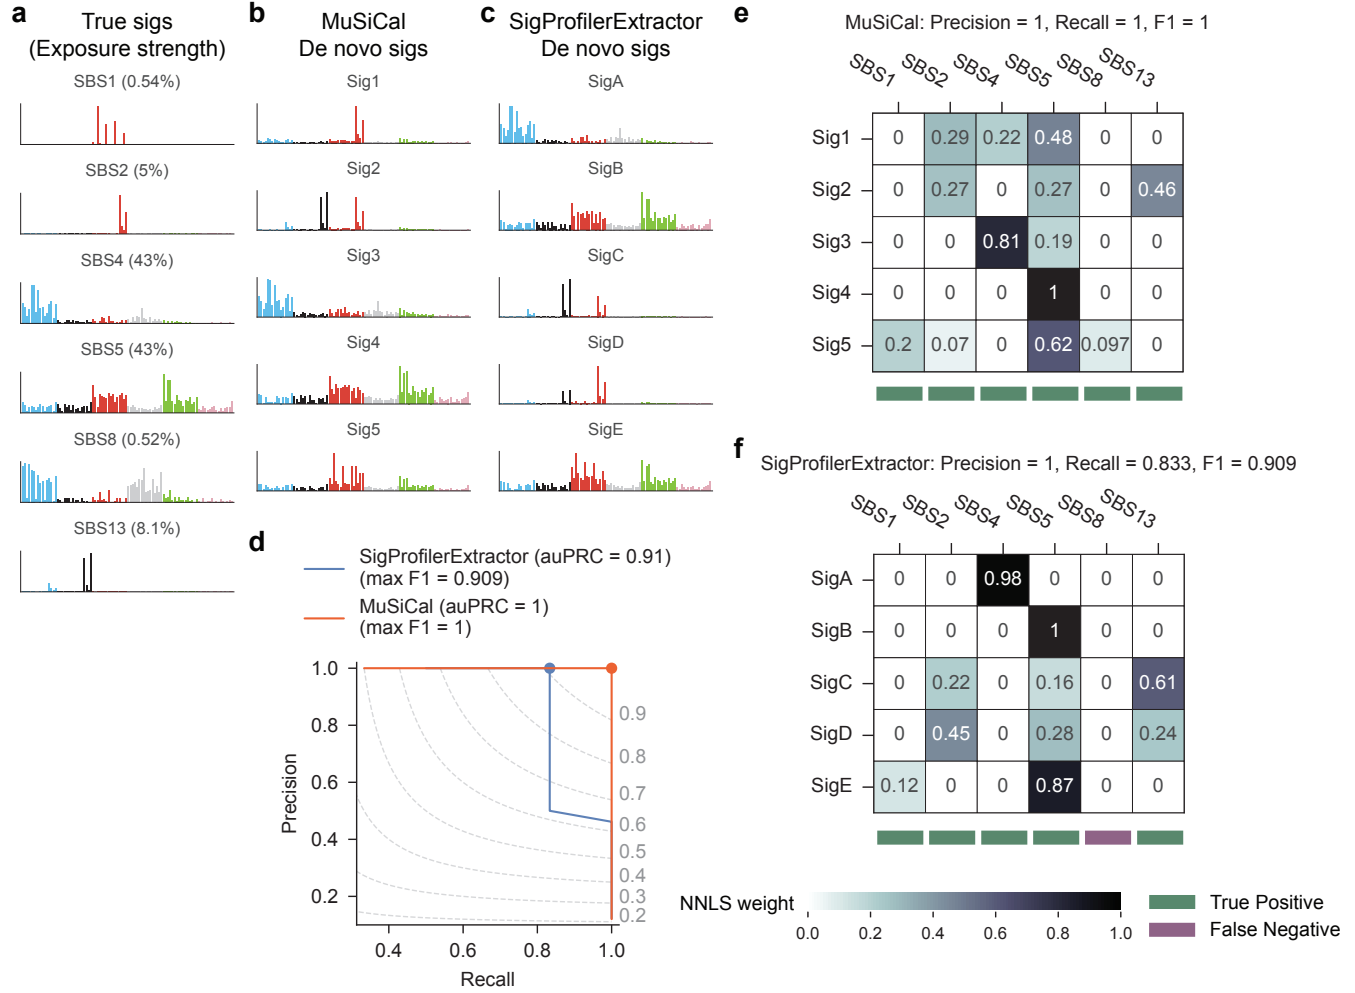

Supplementary Data Fig. 21 Same as Fig. 3a, but for Lung-SCC.

CNS-GBM

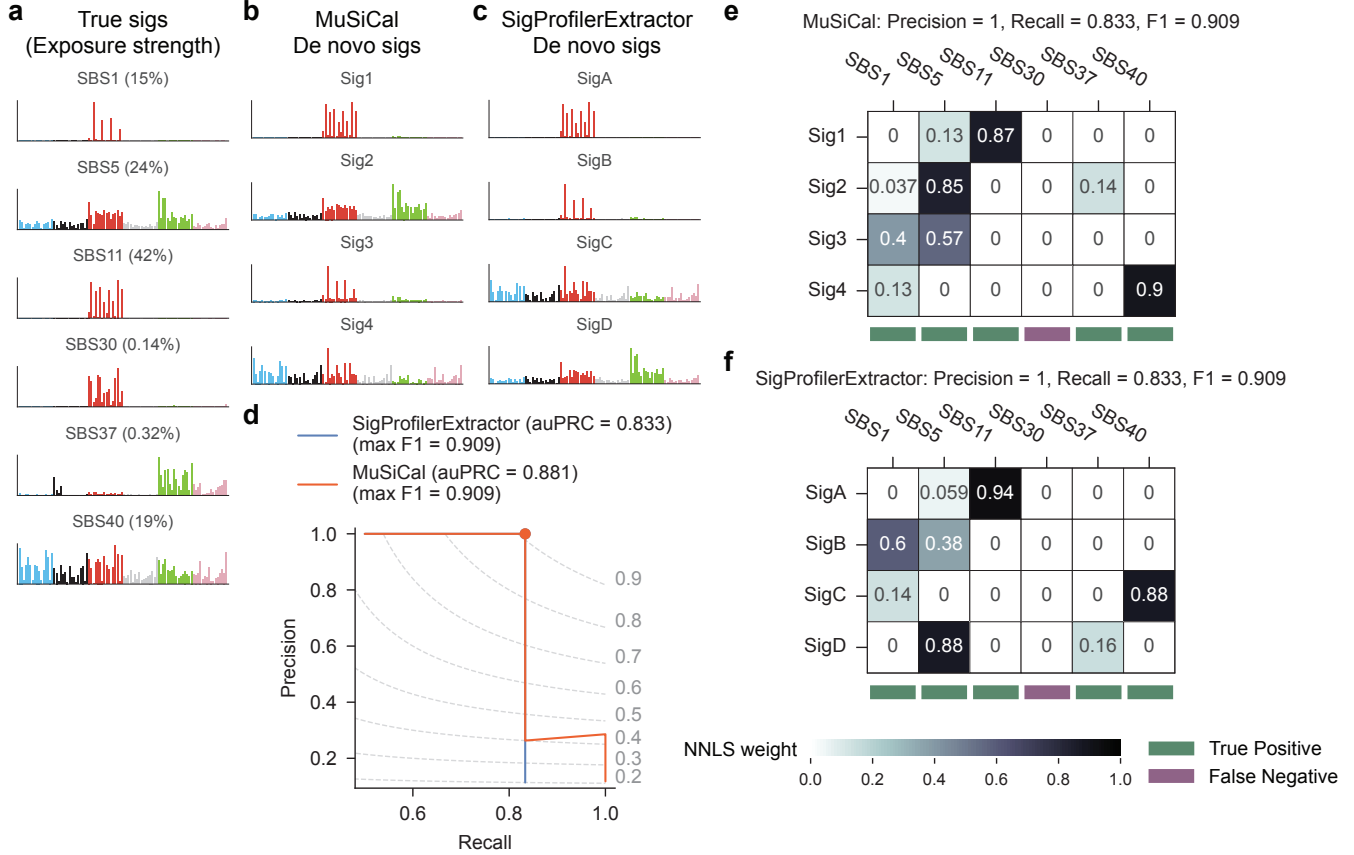

Supplementary Data Fig. 22 Same as Fig. 3a, but for CNS-GBM.

Biliary-AdenoCA

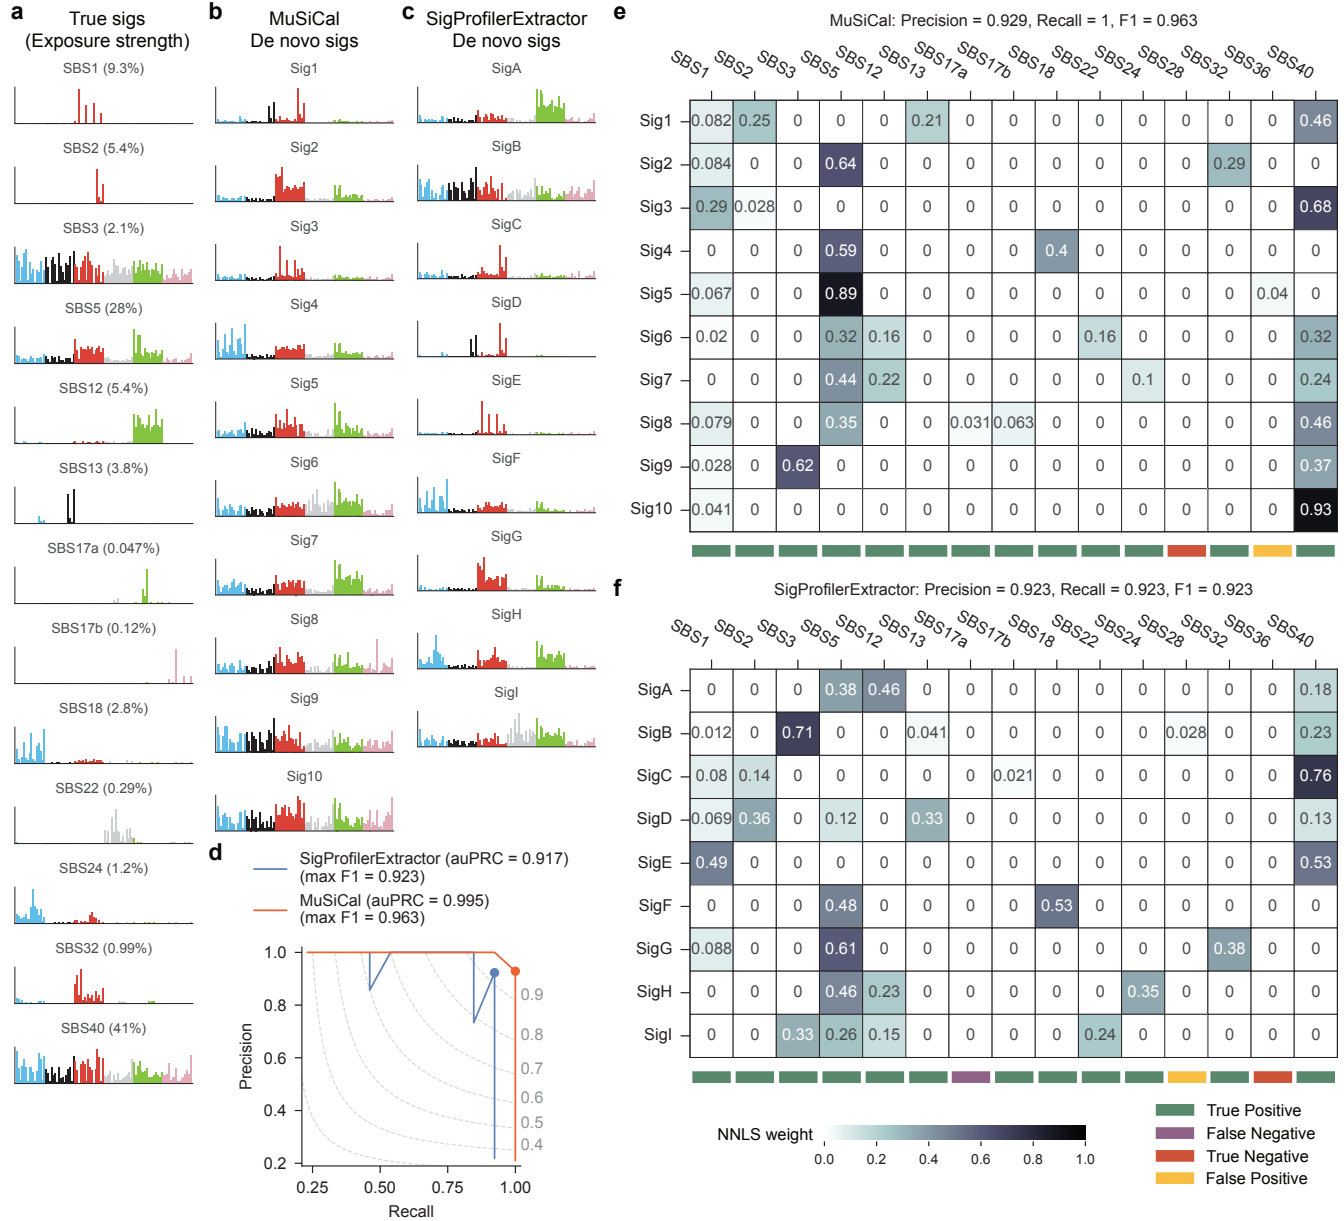

Supplementary Data Fig. 23 Same as Fig. 3a, but for Biliary-AdenoCA.



Kidney-RCC

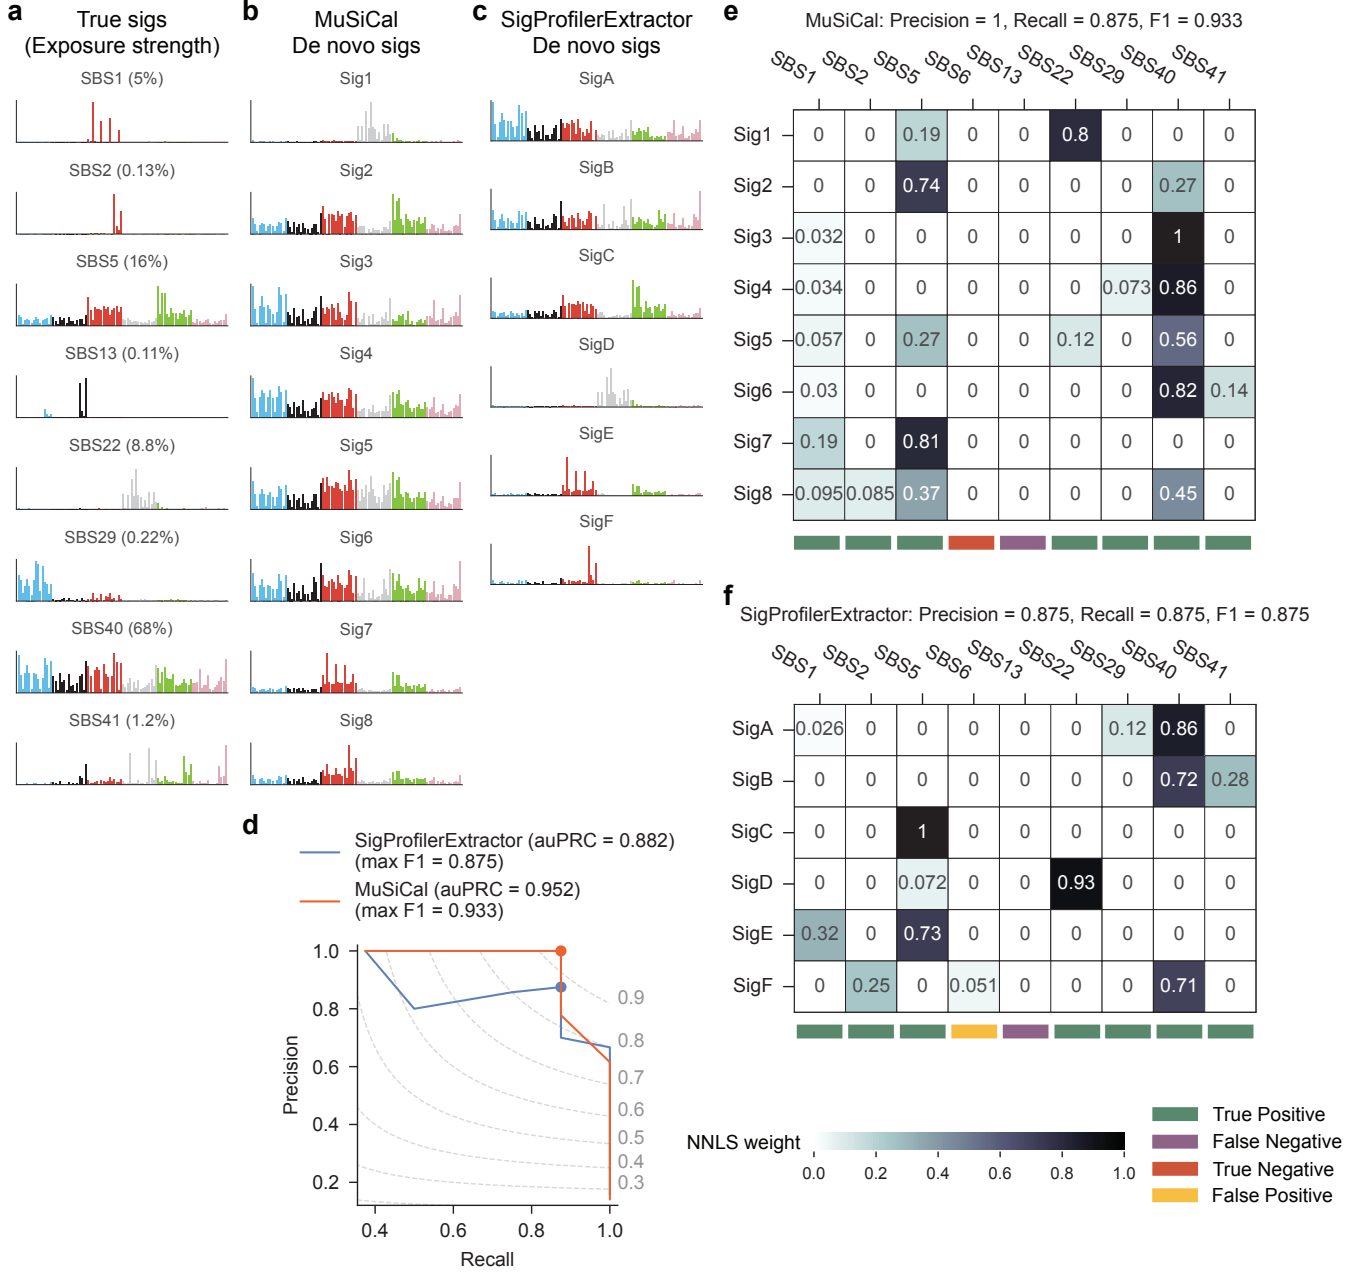

Supplementary Data Fig. 24 Same as Fig. 3a, but for Kidney-RCC.
